# Supplementary material for: Coastal Environments: Mine Discharges and Infringements on Indigenous Peoples’ Rights
Source: MDPI journal article supplement (doi:10.3390/jmse11071447), 2023-07-19
Supplement: s1 [file s1]

# Coastal Environments: Mine Discharges And Infringements On Indigenous Peoples' Rights

W. Charles Kerfoot, Gary Swain, Luis M. Verissimo, Erin Johnston, Carol A. MacLennan, Daniel Schneider and Noel R. Urban

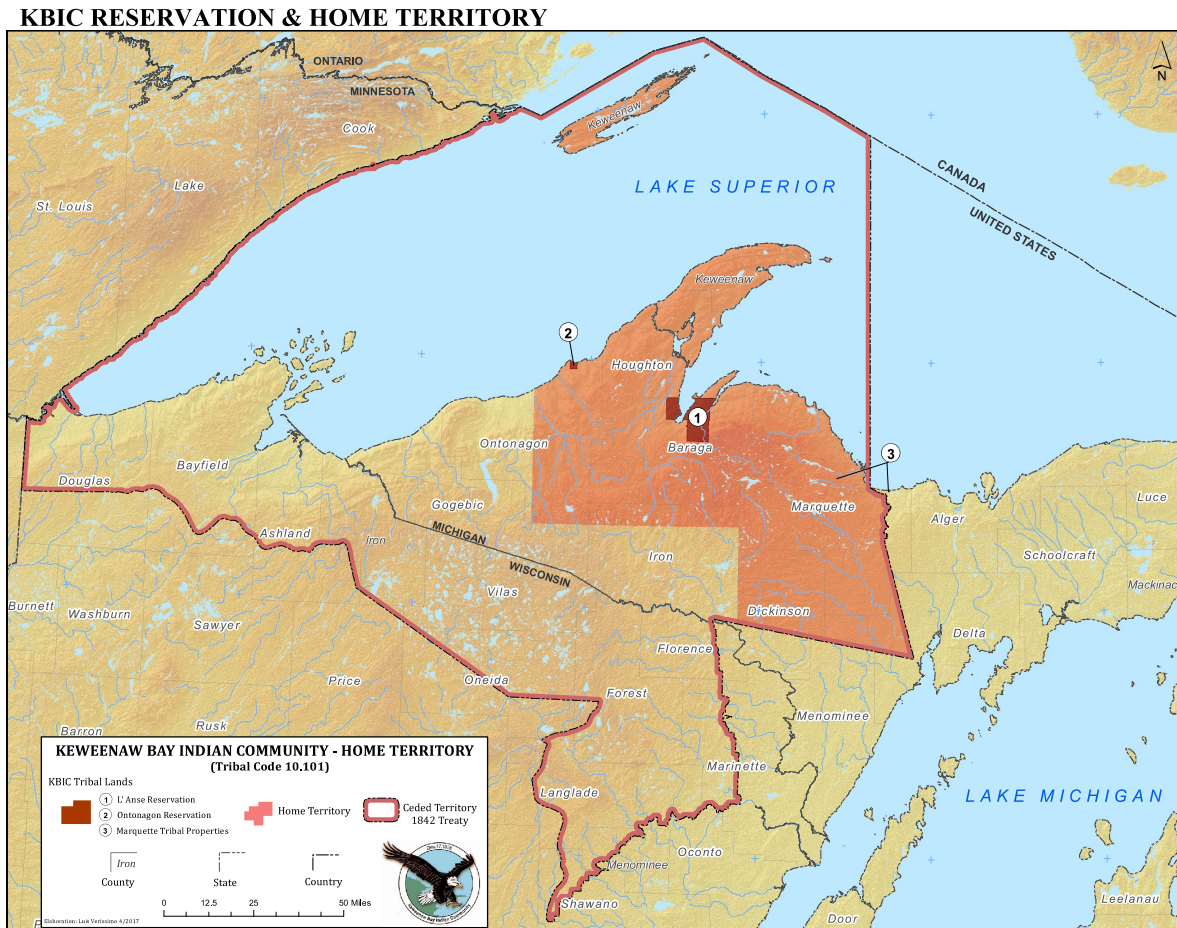

**Figure S1.** Keweenaw Bay Indian Community (KBIC): Ceded Territory of 1842 Treaty, Home Territory, and Reservation Lands.

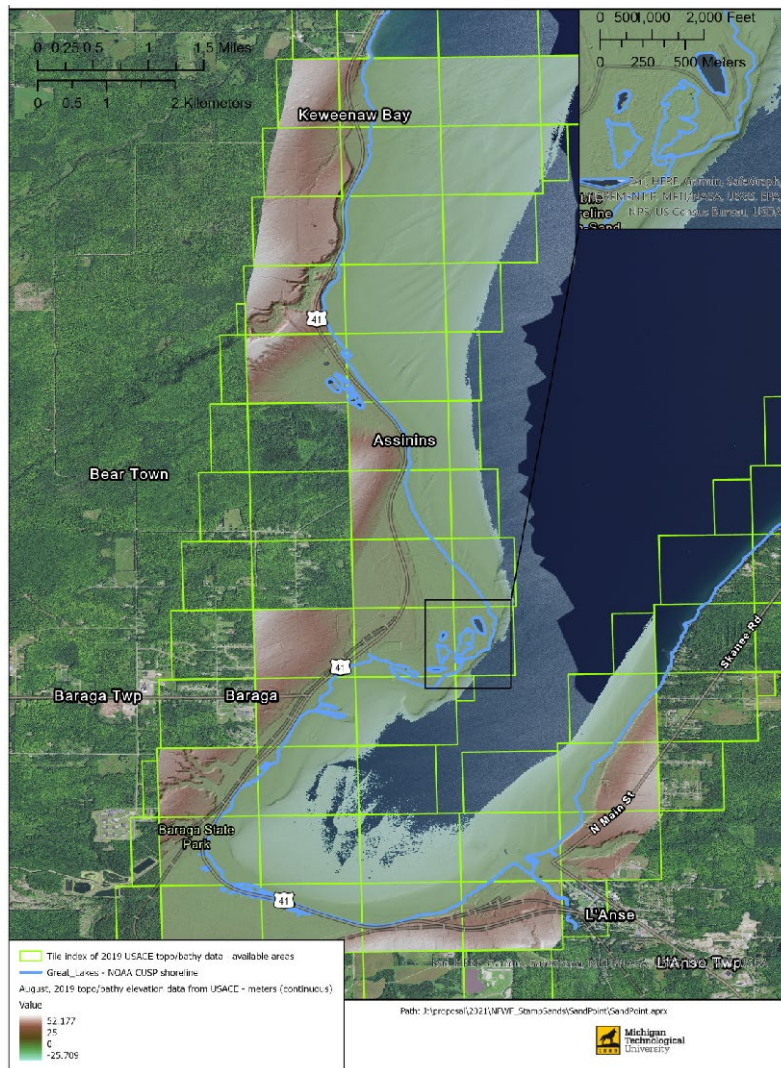

**Figure S2.** Boundaries of LiDAR topographic and bathymetric depth data for Keweenaw Bay to Sand Point, showing shoreline and coastal shelf details.



SHORE COASTAL MORPHOLOGY OF NORTH SHEET

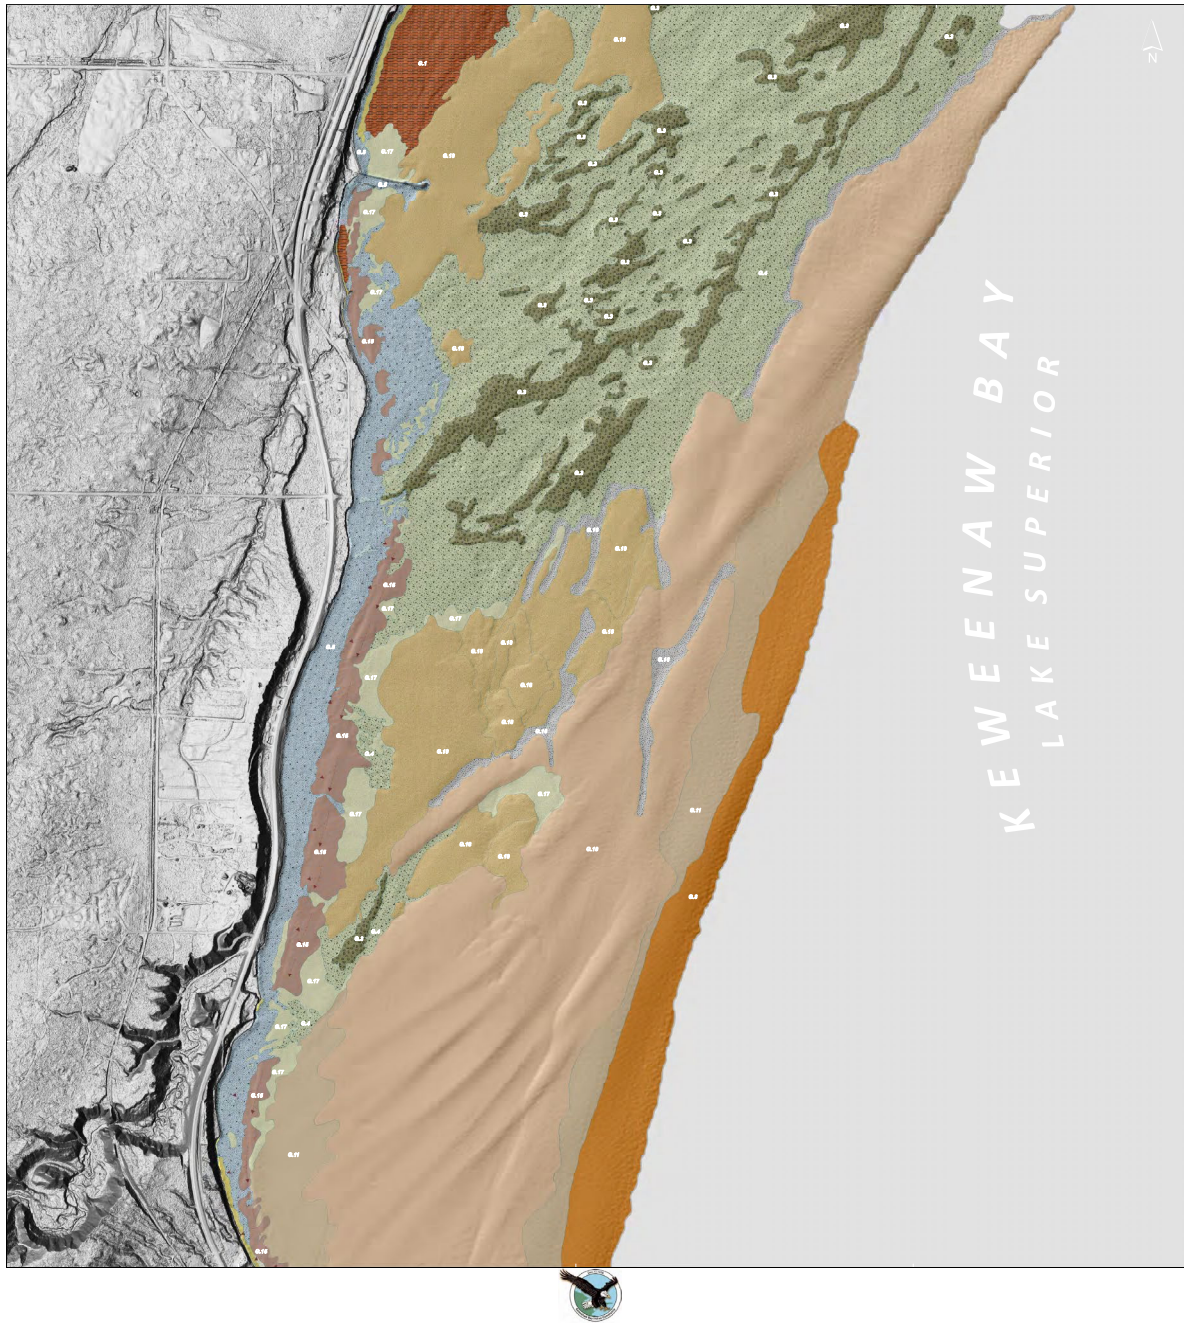

**Figure S3.** Keweenaw Bay Shoreline and Coastal Shelf Geomorphology Map, with list of bottom formations (bedrock formations, boulder/cobble beds, sand fields).

At Sand Point (between points C and D on the map), part of the Keweenaw Bay Indian Community lands, Stampsands from the Mass Mill have accumulated. The area has been restored from a contaminated barren state to a native plant community by KBIC. The map of restored KBIC stampsands is shown below. See report by Pamela Nankervis.

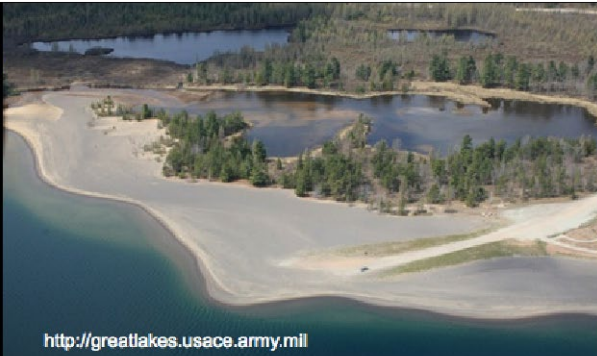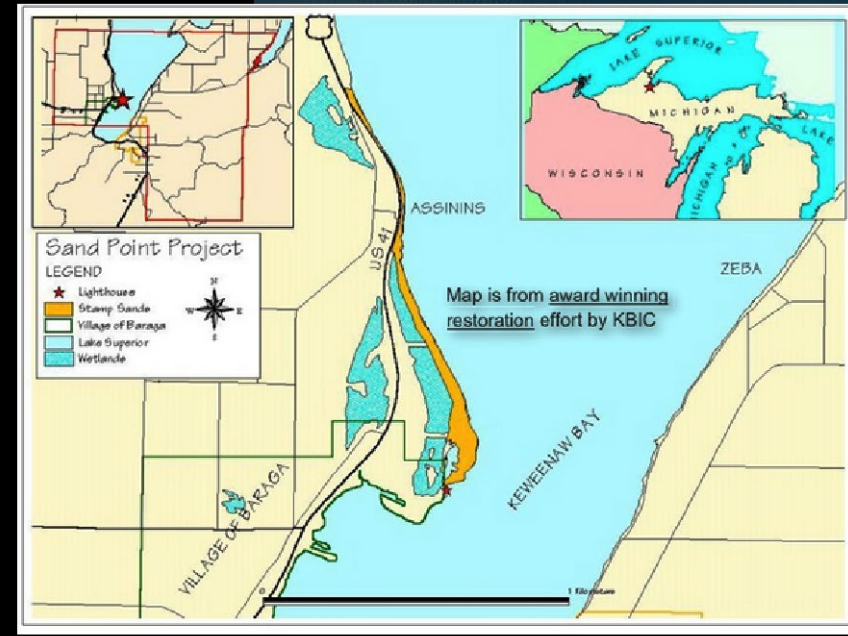

**Figure S4.** Sand Point Remediation Project showing photo (above) of stamp sands distribution before soil cap. Wetland, trails, grass, shrub, and flower planting regions are in green, remaining stamp sand beach is in orange.

**Table S1.** Percentage stamp sands in beach samples from Mass Mill to Sand Point. Location, date, station numbers and percentages are listed below. Percentages feature means, 3-4 subcounts, Standard Deviation (SD) and Coefficient of Variation (CV) for sub-counts. Values arranged by latitude.

| Latitude North | Longitude West | Date Collected | Station  | %Mean Stamp Sand | Individual% Stamp Sand Counts |      |      |      | SD    | CV%    |
|----------------|----------------|----------------|----------|------------------|-------------------------------|------|------|------|-------|--------|
|                |                |                |          |                  | 1st                           | 2nd  | 3rd  | 4th  |       |        |
| 46°52.910      | 88°28.563      | 7/11/19        | KC06     | 4.6              | 15.8                          | 4.4  | 3.6  |      | 1.11  | 24.21% |
| 46°52.876      | 88°28.546      | 7/11/19        | KCOS     | 5.4              | 4.6                           | 7    | 4.5  |      | 1.42  | 26.21% |
| 46°52.835      | 88°28.533      | 7/11/19        | KC04     | 4.6              | 5                             | 4.8  | 4.1  |      | 0.47  | 10.27% |
| 46°52.802      | 88°28.515      | 7/11/19        | KC03     | 7.6              | 15.9                          | 8.7  | 8.3  |      | 1.51  | 19.93% |
| 46°52.787      | 88°28.504      | 7/11/19        | KC02     | 4.6              | 4.5                           | 3.3  | 6    |      | 1.35  | 29.41% |
| 46°52.778      | 88°28.498      | 7/11/19        | KC01     | 4.5              | 4.2                           | 4.9  | 5.5  |      | 0.65  | 13.28% |
| 46°51.817      | 88°28.734      | 5/30/19        | #1A MM   | 78.3             | 87                            | 71.4 | 76.4 |      | 7.97  | 10.17% |
| 46°51.817      | 88°28.734      | 5/30/19        | #1B MM   | 78.6             | 77.3                          | 77.9 | 80.7 |      | 1.81  | 2.31%  |
| 46°51.817      | 88°28.734      | 5/30/19        | #1C MM   | 77.6             | 75.9                          | 77.3 | 79.6 |      | 1.87  | 2.41%  |
| 46°51.809      | 88°28.724      | 5/30/19        | #2 MM    | 79.8             | 80.9                          | 80   | 78.4 |      | 1.27  | 1.59%  |
| 46°51.788      | 88°28.712      | 5/30/19        | #4 MM    | 46.9             | 47.5                          | 46.7 | 46.4 |      | 0.57  | 1.21%  |
| 46°51.773      | 88°28.721      | 5/30/19        | #3 MM    | 69.6             | 74.5                          | 70.8 | 63.5 |      | 5.60  | 8.04%  |
| 46°51.533      | 88°28.735      | 6/17/19        | Sun#13   | 39.8             | 41                            | 35.1 | 43.2 |      | 4.19  | 10.52% |
| 46°51.502      | 88°28.750      | 6/17/19        | Sun#11   | 29               | 32.4                          | 30.7 | 23.8 |      | 4.55  | 15.71% |
| 46°51.462      | 88°28.735      | 6/17/19        | Sun#12   | 30.3             | 32.6                          | 27.3 | 31.1 |      | 2.73  | 9.02%  |
| 46°51.344      | 88°28.665      | 6/17/19        | Jurnu#15 | 79.2             | 82.8                          | 79.3 | 75.6 |      | 3.60  | 4.55%  |
| 46°51.224      | 88°28.702      | 6/17/19        | Jurmu#14 | 61.2             | 61.2                          | 60.1 | 63.1 |      | 1.52  | 2.48%  |
| 46°51.096      | 88°28.718      | 5/30/19        | #5 MM    | 13.8             | 11.9                          | 17.3 | 12.2 |      | 3.03  | 21.99% |
| 46°50.658      | 88°28.884      | 6/17/19        | RR#16    | 48.2             | 51.6                          | 45.7 | 47.4 |      | 3.04  | 6.30%  |
| 46°50.380      | 88°28.867      | 6/27/19        | LCT1002  | 42.7             | 44.7                          | 41.9 | 41.5 |      | 1.74  | 4.08%  |
| 46°50.080      | 88°28.153      | 6/26/19        | PC015    | 8.2              | 8.9                           | 8.2  | 7.5  |      | 0.70  | 8.54%  |
| 46°50.064      | 88°28.963      | 6/17/19        | SRR#18   | 38.35            | 39.9                          | 33.3 | 42.2 |      | 4.62  | 12.05% |
| 46°49.950      | 88°29.052      | 8/20/19        | SLCRO1   | 32.5             | 32.6                          | 33.6 | 31.2 |      | 1.21  | 3.71%  |
| 46°49.936      | 88°29.059      | 8/20/19        | SLCRO2   | 30.2             | 29                            | 30.5 | 31.1 |      | 1.08  | 3.58%  |
| 46°49.553      | 88°28.960      | 6/13/19        | PM#9     | 22               | 20.7                          | 24.2 | 21.1 |      | 1.92  | 8.71%  |
| 46°49.503      | 88°28.916      | 6/13/19        | PM#8A    | 19.7             | 18.8                          | 20.3 | 20.1 |      | 0.81  | 4.13%  |
| 46°49.502      | 88°28.929      | 6/13/19        | PM#8B    | 50.2             | 52.3                          | 44.3 | 53.9 |      | 5.14  | 10.25% |
| 46°49.497      | 88°28.945      | 6/13/19        | PM#8C    | 43.3             | 43.6                          | 44   | 42.4 |      | 0.83  | 1.92%  |
| 46°49.491      | 88°28.945      | 7/5/18         | AT-2     | 49.6             | 50.7                          | 50   | 48.2 |      | 3.18  | 6.40%  |
| 46°49.491      | 88°28.898      | 7/5/18         | AT-4     | 21.7             | 18.2                          | 22.5 | 24.4 |      | 1.29  | 5.94%  |
| 46°49.490      | 88°28.924      | 7/5/18         | AT-3     | 20.5             | 22.3                          | 20.1 | 19.1 |      | 1.64  | 7.99%  |
| 46°49.481      | 88°28.902      | 7/5/18         | AT-1     | 423              | 45.3                          | 46.8 | 34.9 |      | 6.48  | 15.32% |
| 46°49.428      | 88°28.885      | 6/13/19        | PM#7     | 36.9             | 38.2                          | 34   | 385  |      | 2.52  | 6.82%  |
| 46°49.419      | 88°28.904      | 7/5/18         | AT-5     | 45.1             | 51.1                          | 42.9 | 41.3 |      | 5.26  | 11.66% |
| 46°49.348      | 88°28.879      | 6/13/19        | HW41#6   | 53.3             | 58.4                          | 54.1 | 35.5 | 65.3 | 12.75 | 23.92% |
| 46°49.238      | 88°28.786      | 6/13/19        | HW41#4   | 42.9             | 41                            | 42.5 | 45.1 |      | 2.07  | 4.84%  |
| 46°49.238      | 88°28.787      | 6/13/19        | HW41#5   | 43.6             | 41.7                          | 48.4 | 40.7 |      | 4.19  | 9.60%  |
| 46°49.177      | 88°28.739      | 6/13/19        | HW41#3   | 37.6             | 36.6                          | 35.5 | 40.7 |      | 2.74  | 7.29%  |
| 46°49.096      | 88°28.667      | 6/13/19        | HW41#2A  | 33               | 31.3                          | 314  | 36.3 |      | 2.86  | 8.66%  |
| 46°49.096      | 88°28.667      | 6/13/19        | HW41#2B  | 46.7             | 44.8                          | 48.4 | 47.6 |      | 1.89  | 4.05%  |
| 46°49.062      | 88°28.634      | 6/13/19        | HW41#1B  | 67.6             | 70.8                          | 63.7 | 68.4 |      | 3.61  | 5.34%  |
| 46°49.062      | 88°28.634      | 6/13/19        | HW41#1A  | 36               | 33.5                          | 36.5 | 38.1 |      | 2.34  | 6.49%  |
| 46°48.566      | 88°28.422      | 7/5/18         | AT-6     | 55.4             | 54.3                          | 58.8 | 53.1 |      | 3.00  | 5.42%  |

|           |           |         |            |      |      |      |      |      |        |
|-----------|-----------|---------|------------|------|------|------|------|------|--------|
| 46°48.562 | 88°28.417 | 7/5/18  | AT-7       | 44.8 | 38.9 | 50.5 | 45.1 | 5.80 | 12.96% |
| 46°48.560 | 88°28.423 | 7/5/18  | AT-9       | 53.5 | 50.5 | 53.2 | 56.7 | 3.11 | 5.81%  |
| 46°48.552 | 88°28.424 | 7/5/18  | AT-10      | 65.6 | 67.1 | 62.9 | 66.7 | 2.32 | 3.53%  |
| 46°48.495 | 88°28.451 | 7/5/18  | AT-8       | 56.3 | 54.3 | 56.6 | 58.1 | 1.91 | 3.40%  |
| 46°48.440 | 88°28.430 | 7/5/18  | AT-9A      | 73.9 | 75.6 | 75   | 71.1 | 2.44 | 3.31%  |
| 46°48.124 | 88°28.326 | 7/3/19  | SP16       | 48   | 45.3 | 48.7 | 49.9 | 2.39 | 4.97%  |
| 46°48.119 | 88°28.330 | 7/3/19  | SP17       | 52.3 | 52   | 55.2 | 49.7 | 2.76 | 5.28%  |
| 46°48.080 | 88°28.293 | 7/3/19  | SP15       | 51.8 | 55.4 | 51.1 | 48.8 | 3.35 | 6.47%  |
| 46°48.056 | 88°28.294 | 7/3/19  | SP18       | 57.2 | 54.5 | 57.5 | 59.6 | 2.56 | 4.48%  |
| 46°48.030 | 88°28.252 | 7/3/19  | SP14       | 48.4 | 46.8 | 49.7 | 48.7 | 1.47 | 3.04%  |
| 46°48.017 | 88°28.431 | 7/10/18 | Sand Point | 58.7 | 59.8 | 55.9 | 60.5 | 2.48 | 4.22%  |
| 46°47.988 | 88°28.217 | 7/3/19  | SP13       | 58.8 | 60.5 | 61.3 | 54.5 | 3.72 | 6.32%  |
| 46°47.938 | 88°28.180 | 7/3/19  | SP12       | 53.5 | 56.4 | 50   | 54.1 | 3.24 | 6.06%  |
| 46°47.936 | 88°28.187 | 7/3/19  | SP19       | 50.4 | 51.8 | 49   | 50.3 | 1.40 | 2.78%  |
| 46°47.899 | 88°28.136 | 7/3/19  | SP11       | 46.9 | 46.4 | 49.2 | 45   | 2.14 | 4.56%  |
| 46°47.865 | 88°28.109 | 9/12/19 | SPS#005    | 52   | 54.8 | 51   | 50.1 | 0.72 | 1.39%  |
| 46°47.795 | 88°28.051 | 9/12/19 | SPS#006    | 52.3 | 52.5 | 51.5 | 52.9 | 0.72 | 1.38%  |
| 46°47.728 | 88°27.992 | 9/12/19 | SPS#007    | 52.9 | 533  | 55.8 | 49.6 | 3.12 | 5.90%  |
| 46°47.677 | 88°27.931 | 9/12/19 | SPS#008    | 50.3 | 462  | 51   | 53.8 | 3.84 | 7.64%  |
| 46°47.567 | 88°27.844 | 8/20/19 | NLH16      | 51.8 | 49.5 | 54.8 | 51.2 | 2.71 | 5.22%  |
| 46°47.534 | 88°27.842 | 7/5/18  | AT-18      | 55.1 | 56.9 | 49.5 | 58.8 | 4.91 | 8.92%  |
| 46°47.504 | 88°27.829 | 8/20/19 | NLH15      | 57.6 | 57.5 | 59.2 | 56.1 | 1.55 | 2.70%  |
| 46°47.454 | 88°27.773 | 8/20/19 | NLH14      | 40.8 | 39.6 | 39.6 | 43.2 | 2.08 | 5.09%  |
| 46°47.450 | 88°27.789 | 7/5/18  | AT-11      | 59.9 | 59.1 | 61.5 | 59   | 1.42 | 2.36%  |
| 46°47.411 | 88°27.737 | 8/20/19 | NLH13      | 53.7 | 52.4 | 54.3 | 54.3 | 1.10 | 2.04%  |
| 46°47.376 | 88°27.704 | 8/20/19 | NLH12      | 47.5 | 45.1 | 51.1 | 46.3 | 3.17 | 6.68%  |
| 46°47.337 | 88°27.723 | 8/20/19 | NLH11      | 52.1 | 52.3 | 50.8 | 53.1 | 1.17 | 2.24%  |
| 46°47.303 | 88°27.755 | 8/20/19 | NLH10      | 40.4 | 41.3 | 35.9 | 43.6 | 3.95 | 9.78%  |
| 46°47.264 | 88°27.723 | 8/20/19 | NLH09      | 56.2 | 54.5 | 57.9 | 56.2 | 1.70 | 3.02%  |
| 46°47.226 | 88°27.747 | 8/20/19 | NLH08      | 43.9 | 43.3 | 45.5 | 43   | 1.37 | 3.11%  |
| 46°47.199 | 88°27.753 | 8/20/19 | NLH07      | 46.1 | 48.1 | 42.3 | 47.9 | 3.29 | 7.14%  |
| 46°47.171 | 88°27.778 | 8/20/19 | NLH06      | 95.9 | 93.5 | 96.6 | 97.5 | 2.10 | 2.19%  |
| 46°47.161 | 88°27.783 | 8/20/19 | NLH05      | 22.1 | 20.1 | 23.4 | 22.9 | 1.78 | 8.05%  |
| 46°47.128 | 88°27.778 | 8/20/19 | NLH04      | 23.1 | 24.4 | 23.7 | 21.1 | 1.74 | 7.53%  |
| 46°47.107 | 88°27.868 | 8/20/19 | NLH03      | 15.1 | 17.1 | 14.6 | 13.6 | 1.80 | 11.94% |
| 46°47.079 | 88°27.912 | 8/20/19 | NLH02      | 14   | 15.7 | 13.4 | 13   | 1.46 | 10.41% |
| 46°47.070 | 88°27.946 | 8/20/19 | NLH01      | 15.8 | 15.5 | 15.8 | 16.1 | 0.30 | 1.90%  |
| 46°47.060 | 88°27.973 | 7/5/18  | AT-12      | 19.9 | 21.6 | 18   | 20.1 | 1.81 | 9.09%  |
| 46°47.036 | 88°27.989 | 7/3/19  | SP01       | 12.6 | 12.7 | 13   | 12.1 | 0.46 | 3.64%  |
| 46°47.033 | 88°27.995 | 7/3/19  | SP02       | 10.8 | 8.2  | 11.4 | 12.9 | 2.40 | 22.23% |
| 46°47.000 | 88°28.009 | 7/3/19  | SP03       | 18.9 | 20.7 | 18.5 | 17.4 | 1.68 | 8.89%  |
| 46°46.996 | 88°28.009 | 7/5/18  | AT-13      | 37.9 | 32.8 | 38.9 | 42.2 | 4.77 | 12.58% |
| 46°46.988 | 88°28.010 | 7/3/19  | SP04       | 16.9 | 18.4 | 15.8 | 16.5 | 1.35 | 7.96%  |
| 46°46.972 | 88°28.032 | 7/5/18  | AT-14      | 5.4  | 4.5  | 6.5  | 5.2  | 1.01 | 18.79% |
| 46°46.964 | 88°28.032 | 7/3/19  | SP05       | 5.5  | 4.3  | 5    | 7.2  | 1.51 | 27.51% |
| 46°46.962 | 88°28.050 | 7/3/19  | SP06       | 8.2  | 5.3  | 8.9  | 10.3 | 2.58 | 31.46% |
| 46°46.948 | 88°28.062 | 7/3/19  | SP07       | 5.7  | 6.3  | 5.3  | 5.5  | 0.53 | 9.28%  |
| 46°46.945 | 88°28.076 | 7/3/19  | SP08       | 5.3  | 6.1  | 6.6  | 3.3  | 1.78 | 33.56% |
| 46°46.940 | 88°28.103 | 7/3/19  | SP09       | 4.2  | 4.5  | 3.6  | 4.6  | 0.55 | 13.11% |
| 46°46.931 | 88°28.121 | 9/12/19 | CB#001     | 5.8  | 6.4  | 4.8  | 6.1  | 0.85 | 14.66% |

|           |           |         |        |     |     |     |     |      |        |
|-----------|-----------|---------|--------|-----|-----|-----|-----|------|--------|
| 46°46.921 | 88°28.133 | 9/12/19 | CB#002 | 5.3 | 5.4 | 4.3 | 6.2 | 0.95 | 18.00% |
| 46°46.903 | 88°28.156 | 9/12/19 | CB#003 | 7   | 7.7 | 6.9 | 6.4 | 0.66 | 9.37%  |
| 46°46.832 | 88°28.204 | 9/12/19 | CB#004 | 6.6 | 9   | 5   | 5.7 | 2.14 | 32.37% |

**Table S2.** Underwater Ponar samples from Mass Mill to Sand Point. 3-4 sub-counts, with Standard Deviations (SD) and Coefficient of Variation (CV). Predicted Cu concentrations given from Mass Mill pile standard (100% = 3000 ug/g, ppm). Ponar samples arranged by latitude.

| Latitude<br>North | Longitude<br>West | Date<br>Collected | Station  | Depth<br>(m) | %Mean<br>Stamp<br>Sand | Individual% Stamp Sand Counts |      |      |      | SD   | CV     | Cu Conc.<br>(100% 3000<br>µg/g, ppm) |
|-------------------|-------------------|-------------------|----------|--------------|------------------------|-------------------------------|------|------|------|------|--------|--------------------------------------|
|                   |                   |                   |          |              |                        | 1st                           | 2nd  | 3rd  | 4th  |      |        |                                      |
| 46°52.665         | 88°28.117         | 6/25/19           | PC001    | 7.5          | 7                      | 7.3                           | 9.2  | 4.5  |      | 2.36 | 33.78% | 210                                  |
| 46°52.333         | 88°28.110         | 6/25/19           | PC003    | 8.6          | 17.2                   | 8.8                           | 5.7  | 7.1  |      | 1.55 | 21.56% | 216                                  |
| 46°52.027         | 88°28.157         | 6/25/19           | PC004    | 9.0          | 7.5                    | 7                             | 7.9  |      |      |      |        | 225                                  |
| 46°51.899         | 88°28.360         | 6/25/19           | PC005    | 6.5          | 7.2                    | 6                             | 8.3  | 7.4  |      | 1.16 | 16.10% | 216                                  |
| 46°51.705         | 88°28.366         | 6/25/19           | PC006    | 7.0          | 8.5                    | 10                            | 8.1  | 7.5  |      | 1.31 | 15.35% | 255                                  |
| 46°51.639         | 88°28.681         | 6/25/19           | PCX001   | 13.5         | 8.2                    | 7.7                           | 8.1  | 8.7  |      | 0.50 | 6.14%  | 246                                  |
| 46°51.5171        | 88°28.6381        | 6/11/18           | Mass 003 | 6.0          | 7.1                    | 8.2                           | 5.2  | 7.9  |      | 1.65 | 23.27% | 213                                  |
| 46°51.469         | 88°28.301         | 6/25/19           | PC008    | 11.0         | 7.8                    | 6                             | 9    | 8.4  |      | 1.59 | 20.35% | 234                                  |
| 46°50.714         | 88°28.394         | 6/26/19           | PC017    | 7.0          | 10.1                   | 7.9                           | 11.4 | 11   |      | 1.92 | 18.97% | 303                                  |
| 46°50.6673        | 88°28.6136        | 6/11/18           | Mass 004 | 7.0          | 7.8                    | 8                             | 6.4  | 8.5  |      | 1.10 | 14.06% | 234                                  |
| 46°50.528         | 88°28.323         | 6/26/19           | PC016    | 7.8          | 10.7                   | 7.6                           | 11   | 11.7 |      | 2.19 | 20.50% | 321                                  |
| 46°50.5241        | 88°28.6712        | 6/27/19           | LCT1010  | 3.9          | 12.4                   | 12.1                          | 12.1 | 13   |      | 0.52 | 4.19%  | 372                                  |
| 46°50.4964        | 88°28.7175        | 6/27/19           | LCT1009  | 3.1          | 12.2                   | 11.2                          | 12.7 | 12.6 |      | 0.84 | 6.87%  | 366                                  |
| 46°50.4519        | 88°28.7651        | 6/27/19           | LCT1008  | 2.3          | 13.1                   | 14.4                          | 13.7 | 11.1 |      | 1.74 | 13.27% | 393                                  |
| 46°50.4365        | 88°28.7934        | 6/27/19           | LCT1007  | 1.8          | 13.6                   | 12.6                          | 14.6 | 13.5 |      | 1.00 | 7.37%  | 408                                  |
| 46°50.4149        | 88°28.8130        | 6/27/19           | LCT1006  | 1.8          | 16.8                   | 15.7                          | 17.5 | 17.1 |      | 0.95 | 5.63%  | 504                                  |
| 46°50.3944        | 88°28.8521        | 6/27/19           | LCT1003  | 1.5          | 15.2                   | 13.8                          | 15.7 | 16.1 |      | 1.23 | 8.08%  | 456                                  |
| 46°50.3796        | 88°28.8670        | 6/27/19           | LCT1002  | 1.3          | 42.7                   | 44.7                          | 41.9 | 41.5 |      | 1.74 | 4.08%  | 1281                                 |
| 46°50.080         | 88°28.153         | 6/26/19           | PC015    | 8.7          | 8.2                    | 8.9                           | 8.2  | 7.5  |      | 0.70 | 8.54%  | 246                                  |
| 46°49.8173        | 88°28.8004        | 6/27/19           | MLT1010  | 3.8          | 18.7                   | 15.9                          | 18   | 22.1 |      | 3.15 | 16.86% | 561                                  |
| 46°49.7806        | 88°28.8484        | 6/27/19           | MLT1009  | 3.4          | 25                     | 30.8                          | 23   | 20.7 | 25.6 | 4.34 | 17.36% | 750                                  |
| 46°49.7509        | 88°28.8900        | 6/27/19           | MLT1008  | 3.0          | 16.2                   | 13.4                          | 17.5 | 17.8 |      | 2.46 | 15.17% | 486                                  |
| 46°49.7341        | 88°28.9080        | 6/27/19           | MLT1007  | 2.8          | 22                     | 23.3                          | 22.9 | 19.8 |      | 1.92 | 8.71%  | 660                                  |
| 46°49.7147        | 88°28.9382        | 6/27/19           | MLT1006  | 2.4          | 17.8                   | 21.1                          | 19   | 12.1 | 18.9 | 3.92 | 22.01% | 534                                  |
| 46°49.7028        | 88°28.9494        | 6/27/19           | MLT1005  | 2.1          | 18.9                   | 17.5                          | 20.6 | 18.6 |      | 1.57 | 8.32%  | 567                                  |
| 46°49.6975        | 88°28.9601        | 6/27/19           | MLT1004  | 1.8          | 14.7                   | 17.5                          | 12.7 | 14.7 |      | 2.41 | 16.40% | 441                                  |
| 46°49.6848        | 88°28.9746        | 6/27/19           | MLT1003  | 1.7          | 11                     | 9.5                           | 12.5 | 11   |      | 1.50 | 13.64% | 330                                  |
| 46°49.6715        | 88°28.9875        | 6/27/19           | MLT1002  | 1.6          | 16.4                   | 19.2                          | 13.4 | 15.3 |      | 2.96 | 18.03% | 492                                  |
| 46°49.6670        | 88°28.9998        | 6/27/19           | MLT1001  | 1.4          | 16.5                   | 18.6                          | 15.2 | 15.8 |      | 1.81 | 11.00% | 495                                  |
| 46°49.5441        | 88°28.6792        | 6/11/18           | Mass 005 | 6.5          | 7.5                    | 5.9                           | 7.7  | 8.8  |      | 1.46 | 19.52% | 225                                  |
| 46°49.5280        | 88°28.7631        | 6/11/18           | Mass 006 | 5.5          | 16.8                   | 13.4                          | 25.1 | 12.8 | 16   | 5.69 | 33.86% | 504                                  |
| 46°49.4988        | 88°28.8429        | 6/11/18           | Mass 007 | 4.5          | 27.5                   | 26.3                          | 26.9 | 29.4 |      | 1.64 | 5.98%  | 825                                  |
| 46°49.4517        | 88°28.6567        | 6/27/19           | MLT2009  | 3.7          | 14.2                   | 11.2                          | 13.8 | 17.6 |      | 3.22 | 22.67% | 426                                  |
| 46°49.4017        | 88°28.7283        | 6/27/19           | MLT2007  | 2.6          | 20.2                   | 21.2                          | 21.3 | 18.1 |      | 1.82 | 9.01%  | 606                                  |
| 46°49.3770        | 88°28.7627        | 6/27/19           | MLT2005  | 1.8          | 18.5                   | 14.9                          | 19.4 | 21.2 |      | 3.24 | 17.54% | 555                                  |
| 46°49.3567        | 88°28.7883        | 6/27/19           | MLT2003  | 1.6          | 20.7                   | 20.7                          | 19.1 | 22.3 |      | 1.60 | 7.73%  | 621                                  |
| 46°49.3367        | 88°28.8167        | 6/27/19           | MLT2001  | 2.0          | 24.8                   | 23.7                          | 26.6 | 24.1 |      | 1.57 | 6.34%  | 744                                  |
| 46°49.1567        | 88°28.4417        | 6/27/19           | MLT3009  | 5.4          | 6.9                    | 6.3                           | 6.3  | 8.1  |      |      | 15.06% | 207                                  |
| 46°49.1083        | 88°28.4850        | 6/27/19           | MLT3007  | 3.9          | 11.3                   | 12.6                          | 10.7 | 10.6 |      | 1.13 | 9.97%  | 339                                  |
| 46°49.0816        | 88°28.5200        | 6/27/19           | MLT3005  | 2.8          | 20.5                   | 20.8                          | 18.9 | 21.7 |      | 1.43 | 6.97%  | 615                                  |
| 46°49.0617        | 88°28.5467        | 6/27/19           | MLT3003  | 2.1          | 17                     | 17.6                          | 16.7 | 16.8 |      | 0.49 | 2.90%  | 510                                  |
| 46°49.0417        | 88°28.5750        | 6/27/19           | MLT3001  | 3.0          | 12.4                   | 10.7                          | 14   | 12.5 |      | 1.65 | 13.32% | 372                                  |



|            |            |         |          |      |      |      |      |      |      |        |      |
|------------|------------|---------|----------|------|------|------|------|------|------|--------|------|
| 46°48.995  | 88°28.263  | 8/29/19 | AST1010  | 5.2  | 11.1 | 11.8 | 12   | 9.6  | 1.33 | 12.00% | 333  |
| 46°48.964  | 88°28.187  | 8/29/19 | AST1009  | 4.8  | 10   | 9.3  | 10   | 10.6 | 0.65 | 6.51%  | 300  |
| 46°48.936  | 88°28.314  | 8/29/19 | AST1007  | 4.5  | 8.9  | 10.1 | 9.3  | 7.4  | 1.39 | 15.58% | 267  |
| 46°48.909  | 88°28.332  | 8/29/19 | AST1006  | 3.9  | 12.6 | 13.9 | 10.6 | 13.4 | 1.78 | 14.12% | 378  |
| 46°48.893  | 88°28.348  | 8/29/19 | AST1005  | 3.4  | 15   | 17.5 | 13.9 | 13.4 | 2.24 | 14.91% | 450  |
| 46°48.876  | 88°28.361  | 8/29/19 | AST1003  | 2.7  | 14.6 | 15.1 | 15.4 | 13.4 | 1.08 | 7.39%  | 438  |
| 46°48.865  | 88°28.370  | 8/29/19 | AST1002  | 2.3  | 17.3 | 17.7 | 15.5 | 18.7 | 1.64 | 940%   | 519  |
| 46°48.853  | 88°28.377  | 8/29/19 | AST1001  | 2.1  | 16.6 | 15.8 | 15.1 | 19   | 2.08 | 12.53% | 498  |
| 46°48.772  | 88°28.081  | 8/29/19 | AST2010  | 7.5  | 8.5  | 7.6  | 0    | 0    | 0.81 | 9.51%  | 255  |
| 46°48.738  | 88°28.107  | 8/29/19 | AST2009  | 6.4  | 7.2  | 7.2  | 8.3  | 6.1  | 1.10 | 15.28% | 216  |
| 46°48.704  | 88°28.164  | 8/29/19 | AST2007  | 5.2  | 11.1 | 12.3 | 11.5 | 9.6  | 1.39 | 12.49% | 333  |
| 46°48.675  | 88°28.195  | 8/29/19 | AST2006  | 4.9  | 13   | 15.2 | 11.6 | 12.2 | 1.93 | 14.84% | 390  |
| 46°48.637  | 88°28.240  | 8/29/19 | AST2005  | 4.6  | 11.9 | 10.3 | 12.3 | 13   | 1.40 | 11.77% | 357  |
| 46°48.606  | 88°28.288  | 8/29/19 | AST2003  | 2.2  | 13.8 | 12.7 | 15.1 | 13.6 | 1.21 | 8.79%  | 414  |
| 46°48.591  | 88°28.309  | 8/29/19 | AST2002  | 2.7  | 14   | 14.8 | 15.9 | 11.2 | 2.46 | 17.56% | 420  |
| 46°48.572  | 88°28.341  | 8/20/10 | AST2001  | 3.6  | 10.1 | 12.8 | 7.4  | 10.1 | 2.70 | 26.73% | 303  |
| 46°48.4636 | 88°28.2560 | 6/27/19 | SPT1009  | 3.0  | 8.3  | 8.3  | 8.7  | 7.9  | 0.40 | 4.82%  | 249  |
| 46°48.4141 | 88°28.3167 | 6/27/19 | SPT1007  | 3.1  | 25.1 | 23.4 | 28.8 | 23   | 3.24 | 12.91% | 753  |
| 46°48.387  | 88°28.350  | 6/27/19 | SPT1005  | 2.7  | 10.1 | 7.4  | 10.8 | 12.2 | 2.47 | 24.44% | 303  |
| 46°48.367  | 88°28.378  | 6/27/19 | SPT1003  | 1.7  | 24   | 20.2 | 24.1 | 27.6 | 3.70 | 15.42% | 720  |
| 46°48.347  | 88°28.405  | 6/27/19 | SPT1001  | 0.6  | 40.8 | 40.3 | 45.5 | 36.5 | 4.52 | 11.07% | 1224 |
| 46°48.314  | 88°28.189  | 6/27/19 | SPT6010  | 3.5  | 18.9 | 20.3 | 18.1 | 18.3 | 1.22 | 6.44%  | 567  |
| 46°48.284  | 88°28.254  | 8/14/19 | SPT6008  | 2.3  | 16.8 | 16.7 | 17.6 | 16   | 0.80 | 4.77%  | 504  |
| 46°48.276  | 88°28.282  | 8/14/19 | SPT6007  | 2.4  | 23.2 | 26.8 | 23.1 | 19.8 | 3.50 | 15.09% | 696  |
| 46°48.244  | 88°28.302  | 8/14/19 | SPT6003  | 2.2  | 27.9 | 28.8 | 28   | 26.9 | 0.95 | 3.42%  | 837  |
| 46°48.244  | 88°28.286  | 8/14/19 | SPT6006  | 2.3  | 25.9 | 27.9 | 27.2 | 22.7 | 2.82 | 10.90% | 777  |
| 46°48.2356 | 88°28.1480 | 6/27/19 | SPT2009  | 3.9  | 11   | 11.4 | 12.7 | 0    | 1.88 | 17.06% | 330  |
| 46°48.233  | 88°28.307  | 8/14/19 | SPT6002  | 1.7  | 27.5 | 26.5 | 24.8 | 31.3 | 3.37 | 12.26% | 825  |
| 46°48.197  | 88°28.332  | 8/14/19 | SPT6001  | 0.9  | 43.8 | 42.1 | 44.8 | 44.4 | 1.46 | 3.33%  | 1314 |
| 46°48.1865 | 88°28.2228 | 6/27/19 | SPT2007  | 2.2  | 18.4 | 16.6 | 18.6 | 19.9 | 1.66 | 9.03%  | 552  |
| 46°48.1599 | 88°28.2519 | 6/27/19 | SPT2005  | 2.9  | 26.9 | 23.8 | 24.8 | 28.7 | 2.72 | 10.11% | 807  |
| 46°48.1477 | 88°27.8071 | 6/11/18 | Mass 008 | 15.5 | 7.7  | 7.1  | 7.1  | 8.8  | 0.98 | 12.75% | 231  |
| 46°48.1439 | 88°28.2719 | 6/27/19 | SPT2003  | 1.5  | 22.1 | 24.2 | 19.7 | 22.3 | 2.26 | 10.22% | 663  |
| 46°48.1218 | 88°28.2790 | 6/27/19 | SPT2001  | 1.2  | 31.1 | 29.6 | 32.1 | 31.5 | 1.31 | 4.20%  | 933  |
| 46°48.1083 | 88°27.9366 | 6/11/18 | Mass 009 | 7.5  | 11.6 | 11.3 | 12.4 | 11   | 0.74 | 6.35%  | 348  |
| 46°48.079  | 88°27.914  | 8/14/19 | SPT7010  | 4.9  | 8.7  | 9.8  | 8.8  | 7.4  | 1.21 | 13.86% | 261  |
| 46°48.034  | 88°27.984  | 8/14/19 | SPT7009  | 4.0  | 10.4 | 10.7 | 10.1 | 10.4 | 0.30 | 2.88%  | 312  |
| 46°48.0292 | 88°28.1889 | 6/11/18 | Mass 010 | 4.5  | 25.6 | 23.3 | 28.2 | 25.4 | 2.46 | 9.60%  | 768  |
| 46°47.974  | 88°28.046  | 8/14/19 | SPT7007  | 2.9  | 15.6 | 15.9 | 14.1 | 16.7 | 1.33 | 8.54%  | 468  |
| 46°47.962  | 88°28.082  | 8/14/19 | SPT7005  | 2.1  | 21.2 | 21.4 | 21.4 | 20.9 | 0.29 | 1.36%  | 636  |
| 46°47.961  | 88°28.052  | 8/14/19 | SPT7006  | 1.7  | 17.6 | 20.1 | 15.1 | 17.7 | 2.50 | 14.21% | 528  |
| 46°47.936  | 88°28.098  | 8/14/19 | SPT7003  | 1.7  | 25.2 | 28.8 | 22.7 | 24   | 3.21 | 12.75% | 756  |
| 46°47.932  | 88°28.122  | 8/14/19 | SPT7002  | 0.9  | 33   | 30.4 | 36.8 | 31.7 | 3.38 | 10.25% | 990  |
| 46°47.913  | 88°28.120  | 8/14/19 | SPT7001  | 0.8  | 38.9 | 40.4 | 37.5 | 38.9 | 1.45 | 3.73%  | 1167 |
| 46°47.918  | 88°27.795  | 8/14/19 | SPT8010  | 5.1  | 13.1 | 13.2 | 13.2 | 13   | 0.12 | 0.88%  | 393  |
| 46°47.880  | 88°27.843  | 8/14/19 | SPT8009  | 4.3  | 13   | 13.1 | 12.4 | 13.6 | 0.60 | 4.64%  | 390  |
| 46°47.853  | 88°27.840  | 8/14/19 | SPT8008  | 3.2  | 19.7 | 18.7 | 23.6 | 16.8 | 3.51 | 17.81% | 591  |
| 46°47.834  | 88°27.893  | 8/14/19 | SPT8007  | 2.8  | 8.1  | 82   | 8.2  | 7.8  | 0.23 | 2.85%  | 243  |
| 46°47.804  | 88°27.957  | 8/14/19 | SPT8006  | 2.7  | 24.4 | 24.8 | 27.3 | 21.2 | 3.07 | 12.57% | 732  |
| 46°47.7914 | 88°27.7760 | 6/11/18 | Mass 011 | 7.0  | 14.2 | 14.2 | 14.5 | 14   | 0.25 | 1.77%  | 426  |
| 46°47.785  | 88°27.955  | 8/14/19 | SPT8005  | 2.4  | 22.6 | 21.7 | 20.7 | 25.3 | 2.42 | 10.71% | 678  |

|            |            |         |          |     |      |      |      |      |      |        |     |
|------------|------------|---------|----------|-----|------|------|------|------|------|--------|-----|
| 46°47.783  | 88°27.946  | 8/14/19 | SPT8004  | 2.2 | 27   | 27.6 | 25.1 | 28.3 | 1.68 | 6.23%  | 810 |
| 46°47.779  | 88°27.953  | 8/14/19 | SPT8003  | 2.1 | 24.1 | 22.6 | 24.2 | 25.5 | 1.45 | 6.03%  | 723 |
| 46°47.758  | 88°27.955  | 8/14/19 | SPT8002  | 1.5 | 26   | 24.5 | 29.5 | 24.1 | 3.01 | 11.57% | 780 |
| 46°47.751  | 88°27.957  | 8/14/19 | SPT8001  | 1.2 | 28.2 | 26   | 33.4 | 25.1 | 4.55 | 16.15% | 846 |
| 46°47.7391 | 88°27.7183 | 6/27/19 | SPT4009  | 4.3 | 9.3  | 8.5  | 6.2  | 13.3 | 3.62 | 38.95% | 279 |
| 46°47.6918 | 88°27.7851 | 6/27/19 | SPT4007  | 2.7 | 13   | 14.6 | 9.9  | 14.4 | 2.66 | 20.44% | 390 |
| 46°47.6702 | 88°27.8160 | 6/27/19 | SPT4005  | 1.9 | 17.3 | 17.1 | 17.1 | 17   | 0.06 | 0.33%  | 519 |
| 46°47.6507 | 88°27.8482 | 6/27/19 | SPT4003  | 3.0 | 23.7 | 25.3 | 21.8 | 24   | 1.77 | 7.46%  | 711 |
| 46°47.6487 | 88°27.7888 | 6/11/18 | Mass 012 | 4.0 | 19.4 | 20   | 18.1 | 20.1 | 1.13 | 5.81%  | 582 |
| 46°47.6284 | 88°27.8510 | 6/27/19 | SPT4001  | 1.7 | 24.7 | 27.5 | 28.8 | 17.9 | 5.95 | 24.10% | 741 |
| 46°47.5400 | 88°27.6898 | 6/27/19 | SPT5007  | 3.6 | 17.7 | 16.8 | 21.5 | 14.8 | 3.44 | 19.43% | 531 |
| 46°47.5233 | 88°27.7134 | 6/27/19 | SPT5006  | 2.4 | 19.4 | 17.3 | 21.2 | 19.6 | 1.96 | 10.11% | 582 |
| 46°47.5102 | 88°27.7241 | 6/27/19 | SPT5005  | 2.8 | 17   | 20.4 | 15.2 | 15.4 | 2.95 | 17.33% | 510 |
| 46°47.5034 | 88°27.7349 | 6/27/19 | SPT5004  | 3.3 | 16.7 | 17.4 | 14.6 | 18.1 | 1.85 | 11.09% | 501 |
| 46°47.4940 | 88°27.7551 | 6/27/19 | SPT5003  | 2.6 | 18.6 | 19.2 | 18.2 | 18.4 | 0.53 | 2.84%  | 558 |
| 46°47.4814 | 88°27.7649 | 6/27/19 | SPT5002  | 2.0 | 26.1 | 26.1 | 26.1 | 26.1 | 0.00 | 0.00%  | 783 |
| 46°47.4728 | 88°27.7725 | 6/27/19 | SPT5001  | 1.2 | 27.8 | 27.6 | 26.6 | 29.2 | 1.31 | 4.72%  | 834 |

**Table S3.** Sieved Pomar sediment samples .Table lists station names, position (latitude&longitude), depth (B=beach sample, depth in meters), mean particle size(um), and %mass in each sieved size class (screen size).

| Latitude North | Longitude West | Date    | Station  | Depth (m) | Mean Particle Size (µm) | Percent Mass for Each Screen Size |        |         |          |           |          |          |
|----------------|----------------|---------|----------|-----------|-------------------------|-----------------------------------|--------|---------|----------|-----------|----------|----------|
|                |                |         |          |           |                         | 5.3 mm                            | 3 mm   | 1.25 mm | 0.375 mm | 0.1875 mm | 0.094 mm | 0.047 mm |
| 46°52.910      | 88°28.563      | 7/11/19 | KC06     | B         | 668                     | 4.01%                             | 0.04%  | 35.58%  | 57.89%   | 2.47%     | 0.01%    | 0.00%    |
| 46°52.876      | 88°28.546      | 7/11/19 | KC05     | B         | 652                     | 2.88%                             | 0.33%  | 32.80%  | 60.10%   | 3.72%     | 0.18%    | 0.00%    |
| 46°52.835      | 88°28.533      | 7/11/19 | KC04     | B         | 580                     | 9.75%                             | 0.97%  | 25.19%  | 61.67%   | 2.42%     | 0.00%    | 0.00%    |
| 46°52.802      | 88°28.515      | 7/11/19 | KC03     | B         | 495                     | 4.01%                             | 0.14%  | 16.85%  | 70.39%   | 8.52%     | 0.09%    | 0.00%    |
| 46°52.787      | 88°28.504      | 7/11/19 | KC02     | B         | 625                     | 13.37%                            | 2.22%  | 28.00%  | 54.88%   | 1.50%     | 0.04%    | 0.00%    |
| 46°52.778      | 88°28.498      | 7/11/19 | KC01     | B         | 847                     | 11.76%                            | 6.84%  | 38.86%  | 40.84%   | 1.52%     | 0.18%    | 0.00%    |
| 46°52.665      | 88°28.117      | 6/25/19 | PC001    | 7.5       | 241                     | 0.00%                             | 0.00%  | 0.24%   | 51.56%   | 0.02%     | 47.77%   | 0.41%    |
| 46°52.333      | 88°28.110      | 6/25/19 | PC003    | 8.6       | 205                     | 0.00%                             | 0.00%  | 0.16%   | 39.09%   | 0.00%     | 60.09%   | 0.66%    |
| 46°52.027      | 88°28.157      | 6/25/19 | PC004    | 9.0       | 764                     | 0.00%                             | 1.52%  | 43.18%  | 45.08%   | 0.00%     | 9.98%    | 0.24%    |
| 46°51.899      | 88°28.360      | 6/25/19 | PC005    | 6.5       | 274                     | 0.00%                             | 0.00%  | 0.05%   | 64.09%   | 0.01%     | 34.73%   | 1.12%    |
| 46°51.817      | 88°28.734      | 5/30/19 | #1A MM   | B         | 1169                    | 3.54%                             | 19.31% | 40.62%  | 12.82%   | 13.60%    | 7.04%    | 3.08%    |
| 46°51.817      | 88°28.734      | 5/30/19 | #1B MM   | B         | 1116                    | 4.93%                             | 16.79% | 42.05%  | 14.48%   | 13.65%    | 5.87%    | 2.21%    |
| 46°51.817      | 88°28.734      | 5/30/19 | #1C MM   | B         | 1224                    | 4.42%                             | 20.81% | 41.73%  | 12.53%   | 13.22%    | 5.40%    | 1.89%    |
| 46°51.809      | 88°28.724      | 5/30/19 | #2 MM    | B         | 1167                    | 0.00%                             | 1.90%  | 84.84%  | 12.98%   | 0.28%     | 0.00%    | 0.00%    |
| 46°51.788      | 88°28.712      | 5/30/19 | #4 MM    | B         | 1470                    | 4.34%                             | 24.64% | 53.25%  | 17.12%   | 0.59%     | 0.06%    | 0.00%    |
| 46°51.773      | 88°28.721      | 5/30/19 | #3 MM    | B         | 583                     | 0.00%                             | 0.71%  | 25.85%  | 53.80%   | 19.53%    | 0.11%    | 0.00%    |
| 46°51.705      | 88°28.366      | 6/25/19 | PC006    | 7.0       | 217                     | 0.00%                             | 0.02%  | 1.11%   | 39.30%   | 0.00%     | 57.08%   | 2.48%    |
| 46°51.639      | 88°28.681      | 6/25/19 | PCX001   | 13.9      | 679                     | 0.00%                             | 1.28%  | 34.13%  | 49.78%   | 14.06%    | 0.65%    | 0.09%    |
| 46°51.533      | 88°28.735      | 6/17/19 | Sun#13   | B         | 433                     | 0.15%                             | 0.18%  | 9.02%   | 77.35%   | 13.16%    | 0.12%    | 0.01%    |
| 46°51.517      | 88°28.6381     | 6/11/18 | Mass 003 | 6.0       | 128                     | 0.00%                             | 0.00%  | 0.35%   | 2.83%    | 24.38%    | 70.67%   | 1.77%    |
| 46°51.502      | 88°28.750      | 6/17/19 | Sun#11   | B         | 1076                    | 1.41%                             | 11.78% | 46.08%  | 37.68%   | 3.06%     | 0.00%    | 0.00%    |
| 46°51.469      | 88°28.301      | 6/25/19 | PC008    | 11.0      | 371                     | 0.00%                             | 0.08%  | 1.68%   | 91.07%   | 0.00%     | 6.81%    | 0.37%    |
| 46°51.462      | 88°28.735      | 6/17/19 | Sun#12   | B         | 376                     | 0.94%                             | 0.51%  | 0.66%   | 90.57%   | 6.38%     | 0.89%    | 0.04%    |
| 46°51.344      | 88°28.665      | 6/17/19 | Jurmu#15 | B         | 1571                    | 4.04%                             | 27.38% | 56.32%  | 12.15%   | 0.11%     | 0.00%    | 0.00%    |
| 46°51.224      | 88°28.702      | 6/17/19 | Jurmu#14 | B         | 457                     | 0.00%                             | 0.07%  | 9.73%   | 87.58%   | 2.62%     | 0.00%    | 0.00%    |
| 46°51.096      | 88°28.718      | 5/30/19 | #5 MM    | B         | 649                     | 6.34%                             | 2.99%  | 31.03%  | 36.52%   | 15.26%    | 5.15%    | 2.70%    |
| 46°50.714      | 88°28.394      | 6/26/19 | PC017    | 7.0       | 166                     | 0.00%                             | 0.00%  | 1.11%   | 4.10%    | 50.84%    | 43.45%   | 0.50%    |
| 46°50.667      | 88°28.6136     | 6/11/18 | Mass 004 | 7.0       | 143                     | 0.00%                             | 0.00%  | 0.56%   | 2.22%    | 39.53%    | 57.00%   | 0.70%    |
| 46°50.658      | 88°28.884      | 6/17/19 | RR#16    | B         | 1212                    | 0.19%                             | 3.30%  | 85.84%  | 10.67%   | 0.01%     | 0.00%    | 0.00%    |
| 46°50.528      | 88°28.323      | 6/26/19 | PC016    | 7.8       | 206                     | 0.00%                             | 0.00%  | 1.37%   | 17.56%   | 50.65%    | 30.23%   | 0.19%    |
| 46°50.524      | 88°28.6712     | 6/27/19 | LCT1010  | 3.9       | 116                     | 0.00%                             | 0.04%  | 0.24%   | 0.57%    | 18.61%    | 78.86%   | 1.69%    |
| 46°50.496      | 88°28.7175     | 6/27/19 | LCT1009  | 3.1       | 115                     | 0.00%                             | 0.00%  | 0.06%   | 0.23%    | 22.18%    | 75.73%   | 1.82%    |
| 46°50.451      | 88°28.7651     | 6/27/19 | LCT1008  | 2.3       | 168                     | 0.00%                             | 0.00%  | 0.10%   | 1.53%    | 73.96%    | 24.13%   | 0.29%    |
| 46°50.436      | 88°28.7934     | 6/27/19 | LCT1007  | 1.8       | 203                     | 0.00%                             | 0.00%  | 0.03%   | 9.24%    | 88.41%    | 2.30%    | 0.01%    |
| 46°50.414      | 88°28.8130     | 6/27/19 | LCT1006  | 1.8       | 265                     | 0.00%                             | 0.00%  | 0.16%   | 40.61%   | 59.09%    | 0.14%    | 0.00%    |
| 46°50.394      | 88°28.8521     | 6/27/19 | LCT1003  | 1.5       | 589                     | 0.00%                             | 0.00%  | 24.77%  | 73.96%   | 1.02%     | 0.23%    | 0.01%    |
| 46°50.379      | 88°28.8670     | 6/27/19 | LCT1002  | 1.3       | 626                     | 0.00%                             | 0.16%  | 28.61%  | 69.42%   | 1.68%     | 0.13%    | 0.00%    |
| 46°50.105      | 88°28.959      | 6/17/19 | SRR#17   | B         | 1144                    | 0.86%                             | 16.03% | 40.62%  | 40.60%   | 1.89%     | 0.01%    | 0.00%    |
| 46°50.091      | 88°28.969      | 6/17/19 | SRR#19   | B         | 1134                    | 0.25%                             | 1.68%  | 81.89%  | 16.08%   | 0.11%     | 0.00%    | 0.00%    |
| 46°50.080      | 88°28.153      | 6/26/19 | PC015    | 8.7       | 118                     | 0.00%                             | 0.00%  | 0.15%   | 0.50%    | 22.75%    | 75.52%   | 1.07%    |
| 46°50.064      | 88°28.963      | 6/17/19 | SRR#18   | B         | 381                     | 0.00%                             | 0.00%  | 3.58%   | 83.10%   | 13.32%    | 0.00%    | 0.00%    |
| 46°49.950      | 88°29.052      | 8/20/19 | 5LCR01   | B         | 993                     | 0.22%                             | 3.39%  | 60.77%  | 34.66%   | 0.97%     | 0.00%    | 0.00%    |

|                      |         |          |     |      |        |        |        |        |        |        |       |
|----------------------|---------|----------|-----|------|--------|--------|--------|--------|--------|--------|-------|
| 46°49.936 88°29.059  | 8/20/19 | 5LCR02   | B   | 869  | 0.00%  | 0.05%  | 56.56% | 42.16% | 1.23%  | 0.00%  | 0.00% |
| 46°49.817388°28.8004 | 6/27/19 | MLT1010  | 3.8 | 143  | 0.00%  | 0.06%  | 1.01%  | 0.96%  | 35.95% | 60.60% | 1.42% |
| 46°49.780688°28.8484 | 6/27/19 | MLT1009  | 3.4 | 134  | 0.00%  | 0.00%  | 1.30%  | 2.00%  | 21.66% | 72.81% | 2.22% |
| 46°49.750988°28.8900 | 6/27/19 | MLT1008  | 3.0 | 122  | 0.00%  | 0.04%  | 0.37%  | 0.77%  | 22.65% | 73.38% | 2.79% |
| 46°49.734188°28.9080 | 6/27/19 | MLT1007  | 2.8 | 140  | 0.00%  | 0.11%  | 0.78%  | 1.58%  | 32.51% | 63.05% | 1.97% |
| 46°49.714788°28.9382 | 6/27/19 | MLT1006  | 2.4 | 140  | 0.00%  | 0.00%  | 0.51%  | 1.93%  | 37.84% | 57.14% | 2.57% |
| 46°49.702888°28.9494 | 6/27/19 | MLT1005  | 2.1 | 143  | 0.00%  | 0.03%  | 0.49%  | 1.96%  | 40.72% | 54.99% | 1.82% |
| 46°49.697588°28.9601 | 6/27/19 | MLT1004  | 1.8 | 163  | 0.00%  | 0.00%  | 0.07%  | 0.55%  | 71.51% | 27.51% | 0.36% |
| 46°49.684888°28.9746 | 6/27/19 | MLT1003  | 1.7 | 184  | 0.00%  | 0.00%  | 0.03%  | 0.82%  | 92.92% | 6.13%  | 0.09% |
| 46°49.671588°28.9875 | 6/27/19 | MLT1002  | 1.6 | 224  | 0.00%  | 0.04%  | 0.22%  | 19.03% | 78.49% | 2.06%  | 0.17% |
| 46°49.667088°28.9998 | 6/27/19 | MLT1001  | 1.4 | 228  | 0.00%  | 0.00%  | 0.25%  | 23.01% | 71.42% | 5.03%  | 0.29% |
| 46°49.544188°28.6782 | 6/11/18 | Mass 005 | 6.5 | 137  | 0.00%  | 0.02%  | 0.55%  | 1.89%  | 33.44% | 63.37% | 0.72% |
| 46°49.553 88°28.960  | 6/13/19 | PMII9    | B   | 376  | 0.00%  | 0.09%  | 3.46%  | 79.79% | 16.62% | 0.04%  | 0.00% |
| 46°49.528088°28.7631 | 6/11/18 | Mass 006 | 5.5 | 153  | 0.00%  | 0.00%  | 0.28%  | 0.92%  | 57.21% | 40.28% | 1.31% |
| 46°49.503 88°28.916  | 6/13/19 | PMIBA    | B   | 431  | 0.00%  | 0.00%  | 8.85%  | 79.89% | 11.26% | 0.00%  | 0.00% |
| 46°49.502 88°28.929  | 6/13/19 | PM#88    | B   | 547  | 0.00%  | 0.07%  | 22.05% | 65.77% | 11.95% | 0.15%  | 0.00% |
| 46°49.498888°28.8429 | 6/11/18 | Mass 007 | 4.5 | 291  | 0.00%  | 0.21%  | 3.01%  | 38.02% | 53.17% | 5.45%  | 0.14% |
| 46°49.497 88°28.945  | 6/13/19 | PMIIBC   | B   | 885  | 0.00%  | 8.25%  | 37.75% | 34.65% | 19.04% | 0.18%  | 0.13% |
| 46°49.491 88°28.945  | 7/5/18  | AT-2     | B   | 957  | 0.00%  | 4.50%  | 55.42% | 29.28% | 10.44% | 0.27%  | 0.09% |
| 46°49.491 88°28.898  | 7/5/18  | AT-4     | B   | 442  | 0.00%  | 1.32%  | 8.56%  | 67.75% | 21.56% | 0.76%  | 0.06% |
| 46°49.490 88°28.924  | 7/5/18  | AT-3     | B   | 1111 | 0.00%  | 8.43%  | 60.71% | 22.01% | 8.77%  | 0.06%  | 0.02% |
| 46°49.481 88°28.902  | 7/5/18  | AT-1     | B   | 749  | 0.00%  | 0.03%  | 44.50% | 46.88% | 8.32%  | 0.17%  | 0.10% |
| 46°49.451788°28.6567 | 6/27/19 | MLT2009  | 3.7 | 136  | 0.00%  | 0.00%  | 0.42%  | 0.54%  | 38.91% | 59.15% | 0.97% |
| 46°49.428 88°28.885  | 6/13/19 | PMW7     | B   | 784  | 0.49%  | 3.25%  | 39.59% | 45.34% | 11.32% | 0.02%  | 0.00% |
| 46°49.419 88°28.904  | 7/5/18  | AT-5     | B   | 629  | 0.26%  | 2.77%  | 24.23% | 57.20% | 15.27% | 0.28%  | 0.00% |
| 46°49.401788°28.7283 | 6/27/19 | MLT2007  | 2.6 | 149  | 0.00%  | 0.01%  | 0.41%  | 0.85%  | 51.72% | 46.00% | 1.02% |
| 46°49.377088°28.7627 | 6/27/19 | MLT2005  | 1.8 | 213  | 0.00%  | 0.00%  | 0.15%  | 14.45% | 82.28% | 3.04%  | 0.07% |
| 46°49.356788°28.7883 | 6/27/19 | MLT2003  | 1.6 | 227  | 0.00%  | 0.00%  | 0.60%  | 20.80% | 72.65% | 5.87%  | 0.08% |
| 46°49.348 88°28.879  | 6/13/19 | HW41#6   | B   | 259  | 0.00%  | 0.00%  | 1.83%  | 28.44% | 68.00% | 1.73%  | 0.01% |
| 46°49.336788°28.8167 | 6/27/19 | MLT2001  | 2.0 | 241  | 0.00%  | 0.19%  | 0.86%  | 23.13% | 71.05% | 4.63%  | 0.14% |
| 46°49.238 88°28.786  | 6/13/19 | HW41#4   | B   | 779  | 0.00%  | 0.19%  | 45.72% | 53.79% | 0.30%  | 0.00%  | 0.00% |
| 46°49.238 88°28.787  | 6/13/19 | HW41#5   | B   | 278  | 0.00%  | 0.00%  | 0.63%  | 45.18% | 53.75% | 0.44%  | 0.00% |
| 46°49.177 88°28.739  | 6/13/19 | HW41#3   | B   | 1245 | 0.21%  | 10.11% | 70.07% | 15.47% | 4.15%  | 0.00%  | 0.00% |
| 46°49.156788°28.4417 | 6/27/19 | MLT3009  | 5.4 | 169  | 0.00%  | 0.01%  | 1.50%  | 4.72%  | 47.87% | 45.36% | 0.55% |
| 46°49.108388°28.4850 | 6/27/19 | MLT3007  | 3.9 | 145  | 0.00%  | 0.00%  | 0.39%  | 3.02%  | 40.90% | 54.30% | 1.38% |
| 46°49.096 88°28.667  | 6/13/19 | HW41#2A  | B   | 1563 | 3.09%  | 42.58% | 11.52% | 32.50% | 10.32% | 0.00%  | 0.00% |
| 46°49.096 88°28.667  | 6/13/19 | HW41#2B  | B   | 1868 | 1.45%  | 38.93% | 54.79% | 3.16%  | 1.67%  | 0.00%  | 0.00% |
| 46°49.081688°28.5200 | 6/27/19 | MLT3005  | 2.8 | 173  | 0.00%  | 0.08%  | 0.66%  | 2.61%  | 66.90% | 28.91% | 0.84% |
| 46°49.062 88°28.634  | 6/13/19 | HW41#1B  | B   | 1565 | 0.42%  | 19.32% | 78.33% | 1.56%  | 0.37%  | 0.00%  | 0.00% |
| 46°49.062 88°28.634  | 6/13/19 | HW41#1A  | B   | 1797 | 12.30% | 53.74% | 7.29%  | 23.15% | 3.52%  | 0.00%  | 0.00% |
| 46°49.061788°28.5467 | 6/27/19 | MLT3003  | 2.1 | 189  | 0.00%  | 0.01%  | 0.45%  | 8.07%  | 71.65% | 19.63% | 0.19% |
| 46°49.041788°28.5750 | 6/27/19 | MLT3001  | 3.0 | 267  | 0.00%  | 0.08%  | 2.83%  | 33.22% | 48.31% | 13.95% | 1.60% |
| 46°48.995 88°28.263  | 8/29/19 | AST1010  | 5.2 | 227  | 0.00%  | 0.75%  | 4.12%  | 3.23%  | 58.79% | 32.76% | 0.35% |
| 46°48.964 88°28.187  | 8/29/19 | AST1009  | 4.8 | 163  | 0.00%  | 0.07%  | 1.46%  | 2.37%  | 46.71% | 48.89% | 0.50% |
| 46°48.936 88°28.314  | 8/29/19 | AST1007  | 4.5 | 145  | 0.00%  | 0.04%  | 0.66%  | 2.04%  | 39.51% | 56.82% | 0.93% |
| 46°48.909 88°28.332  | 8/29/19 | AST1006  | 3.9 | 131  | 0.00%  | 0.05%  | 0.26%  | 0.58%  | 34.32% | 63.24% | 1.55% |
| 46°48.893 88°28.348  | 8/29/19 | AST1005  | 3.4 | 167  | 0.00%  | 0.13%  | 0.79%  | 2.96%  | 55.32% | 40.04% | 0.76% |
| 46°48.876 88°28.361  | 8/29/19 | AST1003  | 2.7 | 172  | 0.00%  | 0.00%  | 0.30%  | 1.72%  | 74.98% | 22.61% | 0.40% |
| 46°48.865 88°28.370  | 8/29/19 | AST1002  | 2.3 | 178  | 0.00%  | 0.00%  | 0.39%  | 3.06%  | 75.98% | 20.38% | 0.20% |
| 46°48.853 88°28.377  | 8/29/19 | AST1001  | 2.1 | 203  | 0.00%  | 0.00%  | 0.20%  | 9.95%  | 84.02% | 5.78%  | 0.06% |
| 46°48.772 88°28.081  | 8/29/19 | AST2010  | 7.5 | 176  | 0.00%  | 0.54%  | 2.35%  | 2.86%  | 33.33% | 60.43% | 0.48% |



|                      |           |          |            |     |       |       |        |        |        |        |        |       |
|----------------------|-----------|----------|------------|-----|-------|-------|--------|--------|--------|--------|--------|-------|
| 46°48.738            | 88°28.107 | 8/29/19  | AST2009    | 6.4 | 166   | 0.00% | 0.20%  | 0.92%  | 1.72%  | 54.82% | 41.73% | 0.62% |
| 46°48.704            | 88°28.164 | 8/29/19  | AST2007    | 5.2 | 128   | 0.00% | 0.06%  | 0.18%  | 0.69%  | 30.34% | 67.48% | 1.24% |
| 46°48.675            | 88°28.195 | 8/29/19  | AST2006    | 4.9 | 127   | 0.00% | 0.03%  | 0.08%  | 0.21%  | 32.89% | 65.64% | 1.14% |
| 46°48.637            | 88°28.240 | 8/29/19  | AST2005    | 4.6 | 127   | 0.00% | 0.05%  | 0.14%  | 0.18%  | 31.78% | 66.36% | 1.49% |
| 46°48.606            | 88°28.288 | 8/29/19  | AST2003    | 2.2 | 181   | 0.00% | 0.02%  | 0.23%  | 3.43%  | 78.97% | 17.13% | 0.22% |
| 46°48.591            | 88°28.309 | 8/29/19  | AST2002    | 2.7 | 179   | 0.00% | 0.00%  | 0.10%  | 1.96%  | 83.97% | 13.78% | 0.19% |
| 46°48.572            | 88°28.341 | 8/29/19  | AST2001    | 3.6 | 359   | 1.30% | 2.00%  | 10.63% | 13.73% | 51.68% | 15.89% | 4.77% |
| 46°48.566            | 88°28.422 | 7/5/18   | AT-6       | B   | 1166  | 0.00% | 11.67% | 57.09% | 23.76% | 6.65%  | 0.49%  | 0.35% |
| 46°48.562            | 88°28.417 | 7/5/18   | AT-7       | B   | 1087  | 0.70% | 5.99%  | 64.40% | 25.39% | 3.47%  | 0.02%  | 0.02% |
| 46°48.560            | 88°28.423 | 7/5/18   | AT-9       | B   | 716   | 0.00% | 1.02%  | 39.25% | 44.40% | 15.23% | 0.07%  | 0.02% |
| 46°48.552            | 88°28.424 | 7/5/18   | AT-10      | B   | 391   | 0.00% | 0.04%  | 10.18% | 50.41% | 38.51% | 0.84%  | 0.01% |
| 46°48.495            | 88°28.451 | 7/5/18   | AT-8       | B   | 568   | 0.00% | 0.81%  | 23.42% | 58.25% | 17.47% | 0.05%  | 0.00% |
| 46°48.463688°28.2560 | 6/27/19   | SPT1009  | 3.0        | 145 | 0.00% | 0.00% | 0.09%  | 0.20%  | 53.68% | 44.32% | 1.71%  |       |
| 46°48.440            | 88°28.430 | 7/5/18   | AT-9A      | B   | 1109  | 0.66% | 16.65% | 39.66% | 18.07% | 23.85% | 1.02%  | 0.10% |
| 46°48.414188°28.3167 | 6/27/19   | SPT1007  | 3.1        | 648 | 0.00% | 1.79% | 31.52% | 41.52% | 22.85% | 1.69%  | 0.63%  |       |
| 46°48.387            | 88°28.350 | 6/27/19  | SPT1005    | 2.7 | 259   | 0.00% | 0.07%  | 2.87%  | 28.90% | 53.30% | 12.88% | 1.97% |
| 46°48.367            | 88°28.378 | 6/27/19  | SPT1003    | 1.7 | 275   | 0.00% | 0.49%  | 2.71%  | 26.22% | 65.51% | 4.92%  | 0.14% |
| 46°48.347            | 88°28.405 | 6/27/19  | SPT1001    | 0.6 | 694   | 0.00% | 6.88%  | 20.72% | 49.83% | 22.37% | 0.17%  | 0.03% |
| 46°48.314            | 88°28.189 | 8/14/19  | SPT6010    | 3.5 | 166   | 0.00% | 0.14%  | 0.62%  | 0.73%  | 63.38% | 33.55% | 1.57% |
| 46°48.284            | 88°28.254 | 8/14/19  | SPT6008    | 2.3 | 519   | 0.00% | 0.03%  | 18.87% | 69.95% | 9.93%  | 0.99%  | 0.22% |
| 46°48.276            | 88°28.282 | 8/14/19  | SPT6007    | 2.4 | 400   | 0.00% | 0.02%  | 12.51% | 43.10% | 42.88% | 1.27%  | 0.22% |
| 46°48.244            | 88°28.302 | 8/14/19  | SPT6003    | 2.2 | 238   | 0.00% | 0.00%  | 1.51%  | 19.13% | 77.81% | 1.51%  | 0.03% |
| 46°48.244            | 88°28.286 | 8/14/19  | SPT6006    | 2.3 | 217   | 0.00% | 0.02%  | 0.55%  | 13.90% | 82.57% | 2.79%  | 0.18% |
| 46°48.235688°28.1480 | 6/27/19   | SPT2009  | 3.9        | 120 | 0.00% | 0.00% | 0.08%  | 0.17%  | 27.85% | 69.28% | 2.63%  |       |
| 46°48.233            | 88°28.307 | 8/14/19  | SPT6002    | 1.7 | 212   | 0.00% | 0.00%  | 0.70%  | 10.39% | 86.37% | 2.49%  | 0.05% |
| 46°48.197            | 88°28.332 | 8/14/19  | SPT6001    | 0.9 | 385   | 0.00% | 0.50%  | 6.44%  | 61.47% | 31.45% | 0.14%  | 0.00% |
| 46°48.186588~28.2228 | 6/27/19   | SPT2007  | 2.2        | 191 | 0.00% | 0.00% | 0.39%  | 3.44%  | 88.41% | 7.64%  | 0.12%  |       |
| 46°48.159988°28.2519 | 6/27/19   | SPT2005  | 2.9        | 605 | 0.00% | 5.50% | 19.38% | 31.58% | 40.95% | 2.36%  | 0.23%  |       |
| 46°48.147788°27.8071 | 6/11/18   | Mass 008 | 15.5       | 110 | 0.00% | 0.00% | 0.16%  | 0.90%  | 15.20% | 78.96% | 4.78%  |       |
| 46°48.143988°28.2719 | 6/27/19   | SPT2003  | 1.5        | 246 | 0.00% | 0.57% | 6.43%  | 27.83% | 61.61% | 3.48%  | 0.08%  |       |
| 46°48.124            | 88°28.326 | 7/3/19   | SP16       | B   | 493   | 0.00% | 0.09%  | 13.83% | 83.30% | 2.77%  | 0.01%  | 0.00% |
| 46°48.121888°28.2790 | 6/27/19   | SPT2001  | 1.2        | 299 | 0.00% | 0.22% | 2.51%  | 42.29% | 54.68% | 0.30%  | 0.00%  |       |
| 46°48.119            | 88°28.330 | 7/3/19   | SP17       | B   | 414   | 0.00% | 0.03%  | 9.23%  | 67.95% | 22.61% | 0.18%  | 0.00% |
| 46°48.108388°27.9366 | 6/11/18   | Mass 009 | 7.5        | 124 | 0.00% | 0.21% | 0.10%  | 2.14%  | 18.83% | 77.20% | 1.52%  |       |
| 46°48.080            | 88°28.293 | 7/3/19   | SP15       | B   | 393   | 0.00% | 0.04%  | 7.58%  | 65.79% | 26.57% | 0.02%  | 0.00% |
| 46°48.079            | 88°27.914 | 8/14/19  | SPT7010    | 4.9 | 126   | 0.00% | 0.00%  | 1.20%  | 1.78%  | 14.95% | 80.99% | 1.09% |
| 46°48.056            | 88°28.294 | 7/3/19   | SP18       | B   | 1115  | 0.00% | 7.07%  | 63.43% | 29.29% | 0.19%  | 0.03%  | 0.00% |
| 46°48.034            | 88°27.984 | 8/14/19  | SPT7009    | 4.0 | 122   | 0.00% | 0.00%  | 0.13%  | 0.51%  | 27.67% | 69.29% | 2.41% |
| 46°48.030            | 88°28.252 | 7/3/19   | SP14       | B   | 399   | 0.00% | 0.04%  | 5.88%  | 78.79% | 15.28% | 0.00%  | 0.00% |
| 46°48.029288°28.1889 | 6/11/18   | Mass 010 | 4.5        | 279 | 0.26% | 0.89% | 3.05%  | 20.74% | 69.98% | 4.79%  | 0.28%  |       |
| 46°48.017            | 88°28.431 | 7/10/18  | Sand Point | B   | 424   | 0.00% | 0.21%  | 9.32%  | 70.51% | 19.53% | 0.32%  | 0.10% |
| 46°47.988            | 88°28.217 | 7/3/19   | SP13       | B   | 992   | 0.14% | 1.65%  | 65.70% | 32.19% | 0.32%  | 0.00%  | 0.00% |
| 46°47.974            | 88°28.046 | 8/14/19  | SPT7007    | 2.9 | 246   | 0.00% | 0.07%  | 0.91%  | 27.37% | 67.17% | 4.43%  | 0.05% |
| 46°47.962            | 88°28.082 | 8/14/19  | SPT7005    | 2.1 | 969   | 1.52% | 10.64% | 42.23% | 20.91% | 22.25% | 1.43%  | 1.01% |
| 46°47.961            | 88°28.052 | 8/14/19  | SPT7006    | 1.7 | 246   | 0.00% | 0.00%  | 0.47%  | 28.82% | 69.73% | 0.93%  | 0.06% |
| 46°47.938            | 88°28.180 | 7/3/19   | SP12       | B   | 643   | 0.13% | 2.07%  | 26.22% | 63.27% | 8.27%  | 0.04%  | 0.00% |
| 46°47.936            | 88°28.187 | 7/3/19   | SP19       | B   | 541   | 0.00% | 0.03%  | 23.15% | 57.22% | 19.49% | 0.07%  | 0.04% |
| 46°47.936            | 88°28.098 | 8/14/19  | SPT7003    | 1.7 | 522   | 0.00% | 0.73%  | 23.13% | 36.83% | 38.69% | 0.59%  | 0.03% |
| 46°47.932            | 88°28.122 | 8/14/19  | SPT7002    | 0.9 | 319   | 0.00% | 0.00%  | 1.68%  | 60.94% | 37.13% | 0.25%  | 0.00% |
| 46°47.913            | 88°28.120 | 8/14/19  | SPT7001    | 0.8 | 334   | 0.00% | 0.45%  | 3.79%  | 49.99% | 45.46% | 0.31%  | 0.00% |
| 46°47.918            | 88°27.795 | 8/14/19  | SPT8010    | 5.1 | 113   | 0.00% | 0.00%  | 0.07%  | 0.29%  | 19.59% | 78.80% | 1.24% |

|                      |           |          |         |     |       |       |        |        |        |        |        |       |
|----------------------|-----------|----------|---------|-----|-------|-------|--------|--------|--------|--------|--------|-------|
| 46°47.899            | 88°28.136 | 7/3/19   | SP11    | B   | 751   | 0.00% | 0.67%  | 42.16% | 51.44% | 5.73%  | 0.00%  | 0.00% |
| 46°47.880            | 88°27.843 | 8/14/19  | SPT8009 | 4.3 | 138   | 0.00% | 0.01%  | 0.23%  | 0.55%  | 43.50% | 53.12% | 2.59% |
| 46°47.865            | 88°28.109 | 9/12/19  | SPS#005 | B   | 369   | 0.00% | 0.01%  | 2.72%  | 81.06% | 16.19% | 0.02%  | 0.00% |
| 46°47.853            | 88°27.840 | 8/14/19  | SPT8008 | 3.2 | 188   | 0.00% | 0.14%  | 1.98%  | 3.57%  | 61.23% | 32.27% | 0.80% |
| 46°47.834            | 88°27.893 | 8/14/19  | SPT8007 | 2.8 | 207   | 0.00% | 0.00%  | 1.81%  | 6.14%  | 80.76% | 10.84% | 0.46% |
| 46°47.804            | 88°27.957 | 8/14/19  | SPT8006 | 2.7 | 289   | 0.00% | 0.05%  | 2.94%  | 37.46% | 57.75% | 1.72%  | 0.08% |
| 46°47.795            | 88°28.051 | 9/12/19  | SPS#006 | B   | 375   | 0.00% | 0.03%  | 3.60%  | 78.95% | 17.40% | 0.02%  | 0.00% |
| 46°47.791488°27.7760 | 6/11/18   | Mass 011 | 7.0     | 157 | 0.00% | 0.01% | 0.21%  | 1.05%  | 62.18% | 35.52% | 1.03%  |       |
| 46°47.785            | 88°27.955 | 8/14/19  | SPT8005 | 2.4 | 397   | 0.00% | 0.24%  | 11.62% | 43.26% | 43.57% | 1.28%  | 0.04% |
| 46°47.783            | 88°27.946 | 8/14/19  | SPT8004 | 2.2 | 369   | 0.14% | 0.38%  | 8.65%  | 42.75% | 46.61% | 1.41%  | 0.05% |
| 46°47.779            | 88°27.953 | 8/14/19  | SPT8003 | 2.1 | 320   | 0.00% | 0.19%  | 5.42%  | 38.13% | 53.99% | 2.15%  | 0.12% |
| 46°47.758            | 88°27.955 | 8/14/19  | SPT8002 | 1.5 | 276   | 0.00% | 0.00%  | 0.36%  | 45.40% | 53.28% | 0.95%  | 0.01% |
| 46°47.751            | 88°27.957 | 8/14/19  | SPT8001 | 1.2 | 273   | 0.00% | 0.00%  | 0.49%  | 29.17% | 69.18% | 1.12%  | 0.04% |
| 46°47.739188°27.7183 | 6/27/19   | SPT4009  | 4.3     | 114 | 0.00% | 0.00% | 0.06%  | 0.41%  | 22.74% | 69.88% | 6.91%  |       |
| 46°47.728            | 88°27.992 | 9/12/19  | SPS#007 | B   | 400   | 0.00% | 0.17%  | 6.82%  | 72.13% | 20.83% | 0.04%  | 0.03% |
| 46°47.691888°27.7851 | 6/27/19   | SPT4007  | 2.7     | 215 | 0.00% | 1.60% | 0.90%  | 0.21%  | 68.37% | 28.34% | 0.59%  |       |
| 46°47.677            | 88°27.931 | 9/12/19  | SPS#008 | B   | 351   | 0.00% | 0.00%  | 2.38%  | 73.57% | 23.98% | 0.04%  | 0.03% |
| 46°47.670288°27.8160 | 6/27/19   | SPT4005  | 1.9     | 192 | 0.00% | 0.00% | 0.05%  | 4.08%  | 91.41% | 4.37%  | 0.08%  |       |
| 46°47.650788°27.8482 | 6/27/19   | SPT4003  | 3.0     | 217 | 0.00% | 0.00% | 0.52%  | 16.54% | 75.47% | 6.83%  | 0.64%  |       |
| 46°47.648788°27.7888 | 6/11/18   | Mass 012 | 4.0     | 206 | 0.00% | 0.00% | 0.47%  | 9.30%  | 86.19% | 3.97%  | 0.07%  |       |
| 46°47.628488°27.8510 | 6/27/19   | SPT4001  | 1.7     | 223 | 0.00% | 0.00% | 0.80%  | 15.17% | 82.16% | 1.83%  | 0.04%  |       |
| 46°47.567            | 88°27.844 | 8/20/19  | NLH16   | B   | 947   | 0.00% | 2.06%  | 59.57% | 36.48% | 1.89%  | 0.01%  | 0.00% |
| 46°47.540088°27.6898 | 6/27/19   | SPT5007  | 3.6     | 197 | 0.00% | 0.07% | 1.03%  | 5.03%  | 80.40% | 12.46% | 1.01%  |       |
| 46°47.534            | 88°27.842 | 7/5/18   | AT-18   | B   | 755   | 0.00% | 2.36%  | 38.36% | 49.62% | 9.63%  | 0.02%  | 0.00% |
| 46°47.523388°27.7134 | 6/27/19   | SPT5006  | 2.4     | 172 | 0.00% | 0.05% | 0.42%  | 1.41%  | 73.32% | 23.94% | 0.87%  |       |
| 46°47.510288°27.7241 | 6/27/19   | SPT5005  | 2.8     | 178 | 0.00% | 0.00% | 0.14%  | 1.77%  | 83.76% | 13.14% | 1.19%  |       |
| 46°47.504            | 88°27.829 | 8/20/19  | NLH15   | B   | 990   | 0.00% | 2.88%  | 61.71% | 35.32% | 0.09%  | 0.00%  | 0.00% |
| 46°47.503488°27.7349 | 6/27/19   | SPT5004  | 3.3     | 233 | 0.00% | 0.05% | 1.27%  | 19.03% | 74.33% | 4.67%  | 0.65%  |       |
| 46°47.494088°27.7551 | 6/27/19   | SPT5003  | 2.6     | 198 | 0.00% | 0.00% | 0.28%  | 7.57%  | 85.51% | 6.47%  | 0.16%  |       |
| 46°47.481488°27.7649 | 6/27/19   | SPT5002  | 2.0     | 191 | 0.00% | 0.00% | 0.29%  | 3.67%  | 88.80% | 7.13%  | 0.11%  |       |
| 46°47.472888°27.7725 | 6/27/19   | SPT5001  | 1.2     | 238 | 0.00% | 0.17% | 1.33%  | 17.78% | 79.15% | 1.56%  | 0.01%  |       |
| 46°47.454            | 88°27.773 | 8/20/19  | NLH14   | B   | 709   | 0.00% | 1.73%  | 34.02% | 59.51% | 4.74%  | 0.00%  | 0.00% |
| 46°47.450            | 88°27.789 | 7/5/18   | AT-11   | B   | 2126  | 0.09% | 60.74% | 18.14% | 20.16% | 0.86%  | 0.01%  | 0.00% |
| 46°47.411            | 88°27.737 | 8/20/19  | NLH13   | B   | 950   | 0.29% | 4.96%  | 51.09% | 43.10% | 0.56%  | 0.00%  | 0.00% |
| 46°47.376            | 88°27.704 | 8/20/19  | NLH12   | B   | 739   | 0.00% | 0.63%  | 40.39% | 55.99% | 3.00%  | 0.00%  | 0.00% |
| 46°47.337            | 88°27.723 | 8/20/19  | NLH11   | B   | 1097  | 0.24% | 5.46%  | 66.55% | 26.17% | 1.48%  | 0.10%  | 0.00% |
| 46°47.303            | 88°27.755 | 8/20/19  | NLH10   | B   | 884   | 0.30% | 3.13%  | 52.52% | 27.92% | 15.31% | 0.80%  | 0.01% |
| 46°47.264            | 88°27.723 | 8/20/19  | NLH09   | B   | 910   | 0.18% | 0.99%  | 58.54% | 38.92% | 1.34%  | 0.02%  | 0.00% |
| 46°47.226            | 88°27.747 | 8/20/19  | NLH08   | B   | 726   | 0.10% | 2.32%  | 35.57% | 51.20% | 10.69% | 0.10%  | 0.02% |
| 46°47.199            | 88°27.753 | 8/20/19  | NLH07   | B   | 1146  | 0.00% | 3.90%  | 77.19% | 15.50% | 3.38%  | 0.02%  | 0.00% |
| 46°47.171            | 88°27.778 | 8/20/19  | NLH06   | B   | 1886  | 1.29% | 37.38% | 61.11% | 0.17%  | 0.04%  | 0.00%  | 0.00% |
| 46°47.161            | 88°27.783 | 8/20/19  | NLH05   | B   | 726   | 0.28% | 7.15%  | 23.99% | 44.94% | 22.69% | 0.82%  | 0.13% |
| 46°47.128            | 88°27.778 | 8/20/19  | NLH04   | B   | 748   | 0.48% | 5.33%  | 31.11% | 43.37% | 19.67% | 0.04%  | 0.00% |
| 46°47.107            | 88°27.868 | 8/20/19  | NLH03   | B   | 491   | 1.14% | 3.26%  | 10.97% | 52.26% | 32.33% | 0.05%  | 0.00% |
| 46°47.079            | 88°27.912 | 8/20/19  | NLH02   | B   | 879   | 0.12% | 9.95%  | 37.32% | 8.29%  | 44.25% | 0.08%  | 0.00% |
| 46°47.070            | 88°27.946 | 8/20/19  | NLH01   | B   | 321   | 0.00% | 0.05%  | 1.59%  | 36.23% | 61.55% | 0.58%  | 0.00% |
| 46°47.060            | 88°27.973 | 7/5/18   | AT-12   | B   | 316   | 0.00% | 0.00%  | 1.61%  | 59.42% | 38.43% | 0.49%  | 0.03% |
| 46°47.036            | 88°27.989 | 7/3/19   | SP01    | B   | 476   | 0.00% | 0.17%  | 14.45% | 69.75% | 15.57% | 0.07%  | 0.00% |
| 46°47.033            | 88°27.995 | 7/3/19   | SPO2    | B   | 636   | 0.00% | 1.43%  | 27.97% | 59.16% | 11.43% | 0.02%  | 0.00% |
| 46°47.000            | 88°28.009 | 7/3/19   | 5P03    | B   | 436   | 0.57% | 0.50%  | 10.01% | 69.16% | 19.71% | 0.06%  | 0.00% |
| 46°46.996            | 88°28.009 | 7/5/18   | AT-13   | B   | 315   | 0.00% | 0.02%  | 1.78%  | 58.22% | 38.77% | 1.20%  | 0.00% |

|           |           |         |        |   |     |       |       |        |        |        |       |       |
|-----------|-----------|---------|--------|---|-----|-------|-------|--------|--------|--------|-------|-------|
| 46°46.988 | 88°28.010 | 7/3/19  | SP04   | B | 370 | 0.00% | 0.02% | 3.82%  | 75.64% | 20.50% | 0.02% | 0.00% |
| 46°46.972 | 88°28.032 | 7/5/18  | AT-14  | B | 609 | 0.00% | 0.00% | 27.41% | 69.69% | 2.90%  | 0.01% | 0.00% |
| 46°46.964 | 88°28.032 | 7/3/19  | SP05   | B | 390 | 0.00% | 0.00% | 4.58%  | 81.82% | 13.60% | 0.00% | 0.00% |
| 46°46.962 | 88°28.050 | 7/3/19  | SP06   | B | 416 | 0.00% | 0.00% | 8.57%  | 73.45% | 17.97% | 0.01% | 0.00% |
| 46°46.948 | 88°28.062 | 7/3/19  | SP07   | B | 450 | 0.00% | 0.24% | 9.93%  | 79.90% | 9.91%  | 0.02% | 0.00% |
| 46°46.945 | 88°28.076 | 7/3/19  | SP08   | B | 403 | 0.00% | 0.00% | 4.91%  | 87.02% | 8.07%  | 0.00% | 0.00% |
| 46°46.940 | 88°28.103 | 7/3/19  | SP09   | B | 420 | 0.00% | 0.04% | 6.12%  | 88.77% | 5.05%  | 0.02% | 0.00% |
| 46°46.931 | 88°28.121 | 9/12/19 | CB#001 | B | 331 | 0.00% | 0.00% | 0.10%  | 76.07% | 23.58% | 0.24% | 0.00% |
| 46°46.921 | 88°28.133 | 9/12/19 | CB#002 | B | 330 | 0.00% | 0.00% | 0.05%  | 75.91% | 24.02% | 0.02% | 0.00% |
| 46°46.903 | 88°28.156 | 9/12/19 | CB#003 | B | 346 | 0.00% | 0.00% | 2.00%  | 73.21% | 24.42% | 0.36% | 0.02% |
| 46°46.832 | 88°28.204 | 9/12/19 | CB#004 | B | 293 | 0.00% | 0.01% | 0.48%  | 53.48% | 45.78% | 0.25% | 0.00% |

**Table S4.** Manganese adjustment for %SS and copper concentrations in beach & underwater samples. Mn given as % of SS, then converted into Cu adjustment. Top table is for Beach samples (5.7 % SS %mean adjustment; SD =1.0; 171.5 Cu conc correction); bottom is for underwater samples (3.1% SS %adjustment; SD = 0.8; 93.4 Cu conc correction).

| Latitude North | Longitude West | Date    | Station  | Depth (m) | %SS  | %SS Adjusted for Mn | Cu Conc. | Cu Conc. Adjusted for Mn | Cu Conc. error (Mn reduction) | %Mn Mean |
|----------------|----------------|---------|----------|-----------|------|---------------------|----------|--------------------------|-------------------------------|----------|
| 46°51.817      | 88°28.734      | 5/30/19 | #1A MM   | Beach     | 64.1 | 63.3                | 1923     | 1898                     | 25                            | 0.8      |
| 46°51.817      | 88°28.734      | 5/30/19 | #1C MM   | Beach     | 65.2 | 65.2                | 1956     | 1956                     | 0                             | 0.0      |
| 46°51.809      | 88°28.724      | 5/30/19 | #2 MM    | Beach     | 70.9 | 70.9                | 2127     | 2127                     | 0                             | 0.0      |
| 46°51.502      | 88°28.750      | 6/17/19 | Sun#11   | Beach     | 30.9 | 30.7                | 927      | 922                      | 5                             | 0.2      |
| 46°51.344      | 88°28.665      | 6/17/19 | Jurmu#15 | Beach     | 79   | 79.0                | 2370     | 2370                     | 0                             | 0.0      |
| 46°50.105      | 88°28.959      | 6/17/19 | SRR#17   | Beach     | 30.4 | 30.3                | 912      | 910                      | 2                             | 0.1      |
| 46°49.950      | 88°29.052      | 8/20/19 | SLCR01   | Beach     | 33.5 | 33.0                | 1005     | 991                      | 14                            | 0.5      |
| 46°49.503      | 88°28.916      | 6/13/19 | PM#8A    | Beach     | 22.2 | 21.8                | 666      | 654                      | 12                            | 0.4      |
| 46°49.491      | 88°28.945      | 7/5/18  | AT-2     | Beach     | 44.2 | 42.6                | 1326     | 1279                     | 47                            | 1.6      |
| 46°49.428      | 88°28.885      | 6/13/19 | PM#7     | Beach     | 38.4 | 36.9                | 1152     | 1106                     | 46                            | 1.5      |
| 46°49.238      | 88°28.787      | 6/13/19 | HW41#5   | Beach     | 34.7 | 26.6                | 1041     | 797                      | 244                           | 8.1      |
| 46°49.177      | 88°28.739      | 6/13/19 | HW41#3   | Beach     | 37.8 | 37.7                | 1134     | 1131                     | 3                             | 0.1      |
| 46°49.062      | 88°28.634      | 6/13/19 | HW41#1   | Beach     | 68.7 | 68.7                | 2061     | 2061                     | 0                             | 0.0      |
| 46°49.062      | 88°28.634      | 6/13/19 | HW41#1/  | Beach     | 37.6 | 37.6                | 1128     | 1128                     | 0                             | 0.0      |
| 46°48.552      | 88°28.424      | 7/5/18  | AT-10    | Beach     | 65.5 | 26.9                | 1965     | 807                      | 1158                          | 38.6     |
| 46°48.440      | 88°28.430      | 7/5/18  | AT-9A    | Beach     | 69.6 | 21.3                | 2088     | 638                      | 1450                          | 48.3     |
| 46°48.119      | 88°28.330      | 7/3/19  | SP17     | Beach     | 50.9 | 46.2                | 1527     | 1386                     | 141                           | 4.7      |
| 46°48.056      | 88°28.294      | 7/3/19  | SP18     | Beach     | 59.4 | 54.0                | 1782     | 1620                     | 162                           | 5.4      |
| 46°47.988      | 88°28.217      | 7/3/19  | SP13     | Beach     | 54.4 | 54.1                | 1632     | 1623                     | 9                             | 0.3      |
| 46°47.938      | 88°28.180      | 7/3/19  | SP12     | Beach     | 48.5 | 47.3                | 1455     | 1418                     | 37                            | 1.2      |
| 46°47.936      | 88°28.187      | 7/3/19  | SP19     | Beach     | 44.5 | 43.6                | 1335     | 1307                     | 28                            | 0.9      |
| 46°47.865      | 88°28.109      | 9/12/19 | SPS#005  | Beach     | 50.2 | 49.2                | 1506     | 1476                     | 30                            | 1.0      |
| 46°47.795      | 88°28.051      | 9/12/19 | SPS#006  | Beach     | 48.9 | 46.7                | 1467     | 1400                     | 67                            | 2.2      |
| 46°47.534      | 88°27.842      | 7/5/18  | AT-18    | Beach     | 51.9 | 51.1                | 1557     | 1532                     | 25                            | 0.8      |
| 46°47.454      | 88°27.773      | 8/20/19 | NLH14    | Beach     | 41.1 | 39.7                | 1233     | 1192                     | 41                            | 1.4      |
| 46°47.450      | 88°27.789      | 7/5/18  | AT-11    | Beach     | 62.8 | 62.8                | 1884     | 1884                     | 0                             | 0.0      |
| 46°47.264      | 88°27.723      | 8/20/19 | NLH09    | Beach     | 55.7 | 55.4                | 1671     | 1661                     | 10                            | 0.3      |
| 46°47.226      | 88°27.747      | 8/20/19 | NLH08    | Beach     | 35.7 | 35.3                | 1071     | 1059                     | 12                            | 0.4      |
| 46°47.128      | 88°27.778      | 8/20/19 | NLH04    | Beach     | 26.2 | 26.1                | 786      | 783                      | 3                             | 0.1      |
| 46°47.060      | 88°27.973      | 7/5/18  | AT-12    | Beach     | 20.4 | 9.5                 | 612      | 286                      | 326                           | 10.9     |
| 46°47.033      | 88°27.995      | 7/3/19  | SPO2     | Beach     | 14   | 11.1                | 420      | 334                      | 86                            | 2.9      |
| 46°46.996      | 88°28.009      | 7/5/18  | AT-13    | Beach     | 54.4 | 4.3                 | 1632     | 128                      | 1504                          | 50.1     |
| 46°49.8173     | 88°28.8004     | 6/27/19 | MLT1010  | 3.8       | 19   | 7.2                 | 570      | 216                      | 354                           | 11.8     |
| 46°49.7806     | 88°28.8484     | 6/27/19 | MLT1009  | 3.4       | 23.9 | 8.4                 | 717      | 252                      | 465                           | 15.5     |
| 46°49.7147     | 88°28.9382     | 6/27/19 | MLT1006  | 2.4       | 14.4 | 7.4                 | 432      | 222                      | 210                           | 7.0      |
| 46°49.6975     | 88°28.9601     | 6/27/19 | MLT1004  | 1.8       | 10.7 | 7.0                 | 321      | 211                      | 110                           | 3.7      |
| 46°49.6848     | 88°28.9746     | 6/27/19 | MLT1003  | 1.7       | 10.1 | 8.9                 | 303      | 268                      | 35                            | 1.2      |
| 46°49.4988     | 88°28.8429     | 6/11/18 | Mass 007 | 4.5       | 19.7 | 18.4                | 591      | 551                      | 40                            | 1.3      |
| 46°49.3567     | 88°28.7883     | 6/27/19 | MLT2003  | 1.6       | 18   | 16.0                | 540      | 480                      | 60                            | 2.0      |
| 46°49.3367     | 88°28.8167     | 6/27/19 | MLT2001  | 2.0       | 24.6 | 22.8                | 738      | 683                      | 55                            | 1.8      |
| 46°49.1083     | 88°28.4850     | 6/27/19 | MLT3007  | 3.9       | 12.4 | 8.4                 | 372      | 253                      | 119                           | 4.0      |
| 46°49.0617     | 88°28.5467     | 6/27/19 | MLT3003  | 2.1       | 18.9 | 14.4                | 567      | 432                      | 135                           | 4.5      |



|            |            |         |          |     |      |      |      |      |     |     |
|------------|------------|---------|----------|-----|------|------|------|------|-----|-----|
| 46°49.0417 | 88°28.5750 | 6/27/19 | MLT3001  | 3.0 | 18.3 | 17.2 | 549  | 517  | 32  | 1.1 |
| 46°48.4141 | 88°28.3167 | 6/27/19 | SPT1007  | 3.1 | 30.6 | 29.8 | 918  | 893  | 25  | 0.8 |
| 46°48.367  | 88°28.378  | 6/27/19 | SPT1003  | 1.7 | 24.5 | 23.7 | 735  | 711  | 24  | 0.8 |
| 46°48.347  | 88°28.405  | 6/27/19 | SPT1001  | 0.6 | 37.7 | 36.9 | 1131 | 1106 | 25  | 0.8 |
| 46°48.284  | 88°28.254  | 8/14/19 | SPT6008  | 2.3 | 17.7 | 17.6 | 531  | 527  | 4   | 0.1 |
| 46°48.244  | 88°28.302  | 8/14/19 | SPT6003  | 2.2 | 26.6 | 25.8 | 798  | 773  | 25  | 0.8 |
| 46°48.2356 | 88°28.1480 | 6/27/19 | SPT2009  | 3.9 | 12.2 | 8.8  | 366  | 265  | 101 | 3.4 |
| 46°48.197  | 88°28.332  | 8/14/19 | SPT6001  | 0.9 | 37.9 | 37.1 | 1137 | 1114 | 23  | 0.8 |
| 46°48.1083 | 88°27.9366 | 6/11/18 | Mass 009 | 7.5 | 12.4 | 7.0  | 372  | 211  | 161 | 5.4 |
| 46°48.0292 | 88°28.1889 | 6/11/18 | Mass 010 | 4.5 | 23.4 | 21.5 | 702  | 644  | 58  | 1.9 |
| 46°47.962  | 88°28.082  | 8/14/19 | SPT7005  | 2.1 | 21.8 | 20.5 | 654  | 614  | 40  | 1.3 |
| 46°47.932  | 88°28.122  | 8/14/19 | SPT7002  | 0.9 | 31.5 | 30.8 | 945  | 925  | 20  | 0.7 |
| 46°47.913  | 88°28.120  | 8/14/19 | SPT7001  | 0.8 | 32.5 | 30.8 | 975  | 925  | 50  | 1.7 |
| 46°47.758  | 88°27.955  | 8/14/19 | SPT8002  | 1.5 | 25.3 | 22.9 | 759  | 687  | 72  | 2.4 |
| 46°47.6702 | 88°27.8160 | 6/27/19 | SPT4005  | 1.9 | 18.6 | 17.1 | 558  | 512  | 46  | 1.5 |
| 46°47.6507 | 88°27.8482 | 6/27/19 | SPT4003  | 3.0 | 23.8 | 21.5 | 714  | 644  | 70  | 2.3 |
| 46°47.5233 | 88°27.7134 | 6/27/19 | SPT5006  | 2.4 | 20   | 15.7 | 600  | 470  | 130 | 4.3 |
| 46°47.5102 | 88°27.7241 | 6/27/19 | SPT5005  | 2.8 | 14.4 | 11.9 | 432  | 358  | 74  | 2.5 |
| 46°47.4814 | 88°27.7649 | 6/27/19 | SPT5002  | 2.0 | 24.5 | 19.7 | 735  | 590  | 145 | 4.8 |
| 46°47.4728 | 88°27.7725 | 6/27/19 | SPT5001  | 1.2 | 22.2 | 19.1 | 666  | 572  | 94  | 3.1 |
